## Title

2 Lessons from movement ecology for the return to work: modeling contacts and the spread of COVID-19

4

## Authors

6 Allison K. Shaw<sup>1\*</sup>, Lauren A. White<sup>2</sup>, Matthew Michalska-Smith<sup>3,4</sup>, Elizabeth T. Borer<sup>1</sup>, Meggan E.  
Craft<sup>3</sup>, Eric W. Seabloom<sup>1</sup>, Emilie Snell-Rood<sup>1</sup>, Michael Travisano<sup>1,5</sup>

8

1. Department of Ecology, Evolution, and Behavior, University of Minnesota, St. Paul, Minnesota, USA

10 2. National Socio-Environmental Synthesis Center, Annapolis, Maryland, USA

3. Department of Veterinary Population Medicine, University of Minnesota, St. Paul, Minnesota, USA

12 4. Department of Plant Pathology, University of Minnesota, St. Paul, Minnesota, USA

5. BioTechnology Institute, University of Minnesota, St. Paul, Minnesota, USA

14

\* corresponding author: [ashaw@umn.edu](mailto:ashaw@umn.edu)

## 16 **Abstract**

Human behavior (movement, social contacts) plays a central role in the spread of pathogens like SARS-  
18 CoV-2. The rapid spread of SARS-CoV-2 was driven by global human movement, and initial lockdown  
measures aimed to localize movement and contact in order to slow spread. Thus, movement and contact  
20 patterns need to be explicitly considered when making reopening decisions, especially regarding return to  
work. Here, as a case study, we consider the initial stages of resuming research at a large research  
22 university, using approaches from movement ecology and contact network epidemiology. First, we  
develop a dynamical pathogen model describing movement between home and work; we show that  
24 limiting social contact, via reduced people or reduced time in the workplace are fairly equivalent  
strategies to slow pathogen spread. Second, we develop a model based on spatial contact patterns within a  
26 specific office and lab building on campus; we show that restricting on-campus activities to labs (rather  
than labs and offices) could dramatically alter (modularize) contact network structure and thus, potentially  
28 reduce pathogen spread by providing a workplace mechanism to reduce contact. Here we argue that  
explicitly accounting for human movement and contact behavior in the workplace can provide additional  
30 strategies to slow pathogen spread that can be used in conjunction with ongoing public health efforts.

## 32 **Keywords**

contact network epidemiology; disease ecology; infection; mathematical model; network; SARS-CoV-2;  
34 theoretical ecology; theory; transmission

## 36 Introduction

The cosmopolitan connectivity of modern society facilitated the rapid spread of SARS-CoV-2  
38 around the globe in early 2020 [1]. The rate at which any pathogen spreads depends critically on host  
movement behavior [2]. Indeed, estimates of key epidemiological parameters like the basic reproduction  
40 number ( $R_0$ ) are highly variable in part because they are context-specific and are a function of behaviors  
like movement and heterogenous contact structure [3,4]. Although most cases of COVID-19 (the disease  
42 caused by SARS-CoV-2) seem to be mild or even asymptomatic [5,6], the sheer number of cases to date  
means that limited personnel, hospital beds, and ICU equipment can be rapidly overwhelmed, increasing  
44 mortality [7,8]. Thus, continuing normal movement patterns, unmitigated, is not a viable containment  
strategy. Without a vaccine or widespread immunity to SARS-CoV-2, our best defense to slow pathogen  
46 spread has been restricting movement and contacts through physical distancing [9], testing for SARS-  
CoV-2 when available [10] and contact tracing [11]. Lockdown measures have drastically reduced human  
48 movement [1,12] and consequently have reduced the effective reproduction number,  $R_e$  [4,13]. However,  
such measures are affecting mental health [14,15] and have had a devastating impact on the economy, so  
50 individual regions are considering best practices for the reopening of businesses, schools, and other places  
where people gather (e.g.,[16–18]). Decisions regarding next steps can be informed by recognizing that  
52 not all movement patterns nor all contact behaviors are equal in terms of pathogen spread.

Concepts from movement ecology and contact network epidemiology can provide helpful  
54 frameworks for understanding the nuanced interactions between movement, contacts and infection.  
Increased movement does not always mean increased transmission risk [19]; for example, movement that  
56 either takes individuals away from infected areas or reduces contact with infected conspecifics can reduce  
transmission risk (migratory escape; [20,21]). Increased movement can even increase some aspects of  
58 infection risk while decreasing others, simultaneously [22]. Thus, explicitly considering how movement  
relates to transmission can help us understand what effect different movement patterns have on infection

60 dynamics [23,24]. Similarly, from disease ecology and contact network epidemiology, we know that  
structured contacts among individuals in a population have different effects on disease spread than  
62 random contacts. For example, long-range connections in otherwise locally-connected small world  
networks can have dramatic effects on disease spread at a population level [25].

64 Individual movement across multiple scales — from occasional global movements to smaller-  
scale daily patterns — is critical for shaping contact and thus the spread of pathogens. To date, models of  
66 SARS-CoV-2/COVID-19 spread have focused on comparing patterns of spread across countries, states,  
and counties [26,27]. Indeed, a plethora of epidemiological models have proven useful in generating  
68 recommendations for reducing the virus spread rate, from understanding the role of contact-tracing and  
society-wide physical distancing [11,28], to travel restrictions and lockdowns (e.g., [4,29,30]), to mask-  
70 wearing [31]. However, few models offer guidance at scales as fine as individual workplaces, despite the  
fact that this local scale is where individual decisions are made and where most transmission occurs.  
72 Furthermore, apart from time at home, the most predictable component of many people’s days is time  
spent in the workplace. Thus, knowledge of work commute patterns, contact networks of individuals in  
74 the workplace, and related workplace-specific factors could help mitigate pathogen spread during the  
period that total population immunity remains low. In many cases, commute trajectories are not random  
76 but involve regularity in timing, location, and encounters with other individuals along the way (e.g., on  
public transport). Here, we consider the implications for mitigating COVID-19 transmission using a case  
78 study of the initial stages of resuming research at a large research university.

Implicit in this analysis is that COVID-19 is currently spreading in local communities around the  
80 world, and every individual in a workplace is part of a home community. Even under many weeks of  
extreme restrictions with only society’s most essential employees present in workplaces (i.e., Stay at  
82 Home orders), the number of new cases have continued to rise in most locations. For example, in late  
April 2020, even after three weeks of a Stay at Home order and extreme physical distancing in Minnesota,  
84 a state with moderate spread and commendable compliance with the order, the number of new cases

confirmed each day had tripled [32]. With community spread of this pathogen, it is unrealistic to expect  
86 zero workplace infection or widespread virus containment primarily through workplace practices. Any  
return-to-work plan, therefore, must include the explicit expectation that new infections may arise while  
88 concurrently prioritizing worker safety and optimizing the work that can be done. Thus, reopening  
businesses requires an evidence-based plan to reduce contacts through time to minimize new infections at  
90 the workplace, when an infected individual, presumably pre-symptomatic [33], brings the virus to a  
workplace.

92 Here we develop a pair of models to understand how movement and contact structure shape  
infection spread. As a case study, we consider the context of moving from full-time work at home to part-  
94 time resumption of research at a university; however, results from this model are general to many other  
settings as well. We take a dual modeling approach by developing a general movement model and a  
96 network case study of one academic laboratory and office building. We explore tradeoffs between  
limiting contact, people, or time on campus. We find that moving back to work on campus does not  
98 necessarily speed up infection spread, and depends particularly on the infection risk associated with  
commutes and how well physical distancing can be maintained on campus. Thus our findings allow us to  
100 set evidence-based expectations and generate specific behavioral recommendations for a safer return to  
work.

102

## Materials and Methods

104 We develop two models: a movement model to explore movement between home and work  
environments, and a network model to explore contact patterns within the work environment. Both  
106 models are SEIR, tracking susceptible ( $S$ ), exposed ( $E$ ), infected ( $I$ ), and removed (recovered and  
immune, or deceased;  $R$ ) individuals. We assume there is no loss of immunity (removed individuals never  
108 move back to the susceptible class) over the short time scales we consider, and we assume a closed

population (no births, deaths, immigration, or emigration).

110

## 111 **Methods: movement model**

112

### 113 **Setup**

114 Our first model explores infection dynamics as individuals move between home, commuting, and  
work environments. Workplaces, including universities, face a number of different decisions about how to  
116 slowly ramp up work following easing of lockdown. Here, we simulate three potential strategies for  
returning to work: (i) allowing people to return while maintaining physical distancing, (ii) limiting the  
118 number of people returning to campus during the work day, and (iii) limiting the time each person spends  
on campus. For each strategy combination, we simulate infection dynamics and quantify two output  
120 metrics: (1) the ‘final epidemic size’ (cumulative fraction of the population infected, at equilibrium), and  
(2) the ‘epidemic peak size’ (maximum fraction of the population infected during the outbreak). The aim  
122 of this type of conceptual model is to clarify the connections between assumptions and outcomes, unlike  
predictive models which would contain an abundance of empirical data and aim to generate forecasts for a  
124 specific system [34].

### 126 **Daily cycle**

Our model dynamics have a combination of continuous and discrete time (e.g., [35]), where each  
128 day is broken into discrete phases ( $T_h$  spent at home,  $T_w$  spent at work, and  $T_c$  spent commuting each way,  
with  $T_h + T_w + 2T_c = 1$ ) and infection dynamics occur continuously during each phase (Fig 1, see Tables  
130 1-2 for model variables and parameters). All individuals start at home and spend a fraction of their day (of  
length  $T_h$ ) there and not working. During this time, the infection dynamics are given by

132 
$$dS/dt = -\beta_h S (I/N)$$

$$dE/dt = \beta_h S (I/N) - \sigma E \quad [\text{eqn. 1}]$$

134  $dI/dt = \sigma E - \gamma I$

$$dR/dt = \gamma I$$

136 where  $S$  is the number of susceptible individuals,  $E$  is the number of exposed individuals,  $I$  is the number  
of infected individuals,  $R$  is the number of removed (recovered and immune, or deceased) individuals,  $N$   
138 is the total number of individuals in the population ( $N = S + E + I + R$ ),  $\beta_h$  is the rate of transmission while  
at home,  $\sigma$  is the rate of moving from exposed to infected (inverse of the latent period) and  $\gamma$  is the rate of  
140 recovery from infection.

142 **[Fig 1. Movement model schematic, showing a daily cycle.**

All individuals — Susceptible ( $S$ ), Exposed ( $E$ ), Infected ( $I$ ) or Removed ( $R$ ) — spend part of their day  
144 ( $T_h$ ) at home. A proportion  $\theta$  of individuals move to campus, spending  $T_c$  time commuting in each  
direction, and work from campus during the workday (time  $T_w$ ), while the other fraction ( $1 - \theta$ ) works  
146 from home. A total 24 hour cycle is then represented by:  $T_h + T_w + 2 T_c = 1$ . Transmission rates can vary  
among home ( $\beta_h$ ; this includes transmission during essential trips e.g., to the grocery store), commute ( $\beta_c$ ;  
148 traveling between home and work), and work ( $\beta_w$ ; campus-based interactions) environments, while the  
rate of moving from exposed to infected ( $\sigma$ ) and recovery rate ( $\gamma$ ) are the same regardless of where  
150 individuals are located.]

152 Here, the rate at which new susceptible individuals ( $S$ ) become exposed ( $E$ ) depends on three  
components [36]. First is the rate of contact between two individuals in a location. Here we assume this  
154 contact rate is constant (does not change with population density) but can differ across environments  
(home vs. work vs. commuting). Critically, we assume that  $\beta_h$  accounts for transmission not just in an  
156 individual's actual home, but transmission that occurs during other essential activities during lockdown  
(e.g., grocery store trips). Second is the probability that the contact for each susceptible individual is with

158 an infected individual; this is given by the proportion of infected individuals in the local population ( $I/N$ ).

Third is the probability that contact with an infectious individual results in transmission. In equation 1  
160 above (and the other equations below), we have combined the first and third factors into a single term,  $\beta$ ,  
while the second factor is given by  $I/N$ . Overall, this gives us frequency-dependent transmission  
162 (transmission rate depends on the frequency — not density — of infected individuals in the population);  
an appropriate assumption for spatially structured environments [2,36].

164 After the period of time at home ( $T_h$ ), a fraction,  $\theta$ , of all individuals commute to work while the  
remaining  $(1 - \theta)$  stay to work from home. At this point we subdivide the population based on the number  
166 of individuals of each type and fraction commuting. We denote location by subscripts ( $h$  for home,  $c$  for  
commute), so the number of individuals of each type are

$$\begin{aligned} 168 \quad S_c(T_h) &= \theta S(T_h) \\ E_c(T_h) &= \theta E(T_h) \\ 170 \quad I_c(T_h) &= \theta I(T_h) \\ R_c(T_h) &= \theta R(T_h) && \text{[eqn. 2]} \\ 172 \quad S_h(T_h) &= (1 - \theta) S(T_h) \\ E_h(T_h) &= (1 - \theta) E(T_h) \\ 174 \quad I_h(T_h) &= (1 - \theta) I(T_h) \\ R_h(T_h) &= (1 - \theta) R(T_h) . \end{aligned}$$

176 During the commute phase, the infection dynamics for those commuting are given by

$$\begin{aligned} dS_c/dt &= -\beta_c S_c (I_c/N_c) \\ 178 \quad dE_c/dt &= \beta_c S_c (I_c/N_c) - \sigma E_c && \text{[eqn. 3]} \\ dI_c/dt &= \sigma E_c - \gamma I_c \\ 180 \quad dR_c/dt &= \gamma I_c \end{aligned}$$

where  $N_c$  is the total number of individuals commuting ( $N_c = S_c + E_c + I_c + R_c$ ), and  $\beta_c$  is the rate of  
182 transmission while commuting. Similarly, during the commute phase, the infection dynamics for those



still at home are given by

$$\begin{aligned} 184 \quad & dS_h/dt = -\beta_h S_h (I_h/N_h) \\ & dE_h/dt = \beta_h S_h (I_h/N_h) - \sigma E_h \quad [eqn. 4] \\ 186 \quad & dI_h/dt = \sigma E_h - \gamma I_h \\ & dR_h/dt = \gamma I_h \end{aligned}$$

188 where  $N_h$  is the total number of individuals at home ( $N_h = S_h + E_h + I_h + R_h$ ).

After the commute phase (of length  $T_c$ ), comes a work phase. Here, the population continues to be  
190 subdivided into eight types, where the number of individuals of each type are

$$\begin{aligned} & S_w(T_h+T_c) = S_c(T_h+T_c) \\ 192 \quad & E_w(T_h+T_c) = E_c(T_h+T_c) \\ & I_w(T_h+T_c) = I_c(T_h+T_c) \\ 194 \quad & R_w(T_h+T_c) = R_c(T_h+T_c) \quad [eqn. 5] \\ & S_h(T_h+T_c) = S_h(T_h+T_c) \\ 196 \quad & E_h(T_h+T_c) = E_h(T_h+T_c) \\ & I_h(T_h+T_c) = I_h(T_h+T_c) \\ 198 \quad & R_h(T_h+T_c) = R_h(T_h+T_c) \end{aligned}$$

where the subscript  $w$  denotes work. Note that individuals that work on campus switch from a commute  
200 (c) subscript to a work (w) one here, while individuals that work at home continue with the same  
subscript (h). Both groups are still experiencing infection dynamics. During the work phase, the infection  
202 dynamics in the workplace are given by

$$\begin{aligned} & dS_w/dt = -\beta_w S_w (I_w/N_w) \\ 204 \quad & dE_w/dt = \beta_w S_w (I_w/N_w) - \sigma E_w \quad [eqn. 6] \\ & dI_w/dt = \sigma E_w - \gamma I_w \\ 206 \quad & dR_w/dt = \gamma I_w \end{aligned}$$

where  $N_w$  is the total number of individuals at work ( $N_w = S_w + E_w + I_w + R_w$ ), and  $\beta_w$  is the rate of

208 transmission while at work. During the work phase, the infection dynamics for those working at home are  
given by [eqn. 4] above.

210 After the work phase (of length  $T_w$ ), we describe a second commute phase. The population  
continues to be subdivided into eight types, where the number of individuals of each type are

$$\begin{aligned} 212 \quad S_c(T_h+T_c+T_w) &= S_w(T_h+T_c+T_w) \\ E_c(T_h+T_c+T_w) &= E_w(T_h+T_c+T_w) \\ 214 \quad I_c(T_h+T_c+T_w) &= I_w(T_h+T_c+T_w) \\ R_c(T_h+T_c+T_w) &= R_w(T_h+T_c+T_w) \quad [\text{eqn. 7}] \\ 216 \quad S_h(T_h+T_c+T_w) &= S_h(T_h+T_c+T_w) \\ E_h(T_h+T_c+T_w) &= E_h(T_h+T_c+T_w) \\ 218 \quad I_h(T_h+T_c+T_w) &= I_h(T_h+T_c+T_w) \\ R_h(T_h+T_c+T_w) &= R_h(T_h+T_c+T_w) . \end{aligned}$$

220 During this second commute phase (also of length  $T_c$ ), the infection dynamics for those commuting are  
given by [eqn. 3] above, and the infection dynamics for those still at home are given by [eqn. 4] above. At  
222 the end of the second commute phase, all individuals are back in the home environment (no longer  
subdivided) and the number of individuals of each type are

$$\begin{aligned} 224 \quad S(T_h+2T_c+T_w) &= S_w(T_h+2T_c+T_w) + S_h(T_h+2T_c+T_w) \\ E(T_h+2T_c+T_w) &= E_w(T_h+2T_c+T_w) + E_h(T_h+2T_c+T_w) \quad [\text{eqn. 8}] \\ 226 \quad I(T_h+2T_c+T_w) &= I_w(T_h+2T_c+T_w) + I_h(T_h+2T_c+T_w) \\ R(T_h+2T_c+T_w) &= R_w(T_h+2T_c+T_w) + R_h(T_h+2T_c+T_w) . \end{aligned}$$

228 This ends the cycle for a single day; the next day starts the cycle again.

## 230 Model Parameters

We used a fixed population size ( $N$ ) of 3,000 individuals. We did not include births or deaths, or

232 movement in and out of the population. These are reasonable assumptions given the scope of our  
simulations: a work population that is not hiring new employees and has few retirements or actual deaths  
234 over a few months. Because we assumed frequency-dependent transmission, the relative fraction of the  
population infected is the same regardless of population size.

236 Infection parameters were calculated as follows. We used 4.2 days as the latent period [37] and  
calculated the rate of moving from exposed to infected ( $\sigma$ ) as the inverse of this:  $\sigma = 1/4.2 = 0.238$  per  
238 day. We used 9.5 days as the infectious period (the estimated length of viral shedding for SARS-coV-2;  
[38]), and calculated the recovery rate ( $\gamma$ ) as the inverse of this:  $\gamma = 1/9.5 = 0.105$  per day. Transmission  
240 rate ( $\beta$ ) was calculated based on the basic reproductive number,  $R_0$ . We assumed a ‘baseline’  $R_0$   
(unmitigated; no behavioral changes like physical distancing) of 2.5 based on current estimates for SARS-  
242 coV-2 [39], although some estimates put  $R_0$  as high as 5.7 [37]. To quantify how behavioral changes to  
movement and contact affect transmission we defined effective reproduction numbers ( $R_e$ ) for each of the  
244 environments (home, work, commute). We assumed that stay-at-home measures to reduce pathogen  
spread in the community halved the rate of contacts at home (e.g., [40]), that is  $R_{e-h} = 0.5R_0$ . We assumed  
246 that infection at work could be anywhere between current infection rates at home ( $R_{e-w} = 0.5R_0$ ) and  
unmitigated rates ( $R_{e-w} = R_0$ ). To facilitate interpretation of our results, we also describe infection at work  
248 in terms of the fraction increase in transmission compared to home, where 0 indicates transmission is the  
same at work and home, 0.5 indicates transmission at work is 50% higher than at home and 1 indicates  
250 transmission at work is 100% higher than at home (i.e., double). Finally, we assumed that infection while  
commuting spanned a broader range of possible values than either home or work. At one extreme,  
252 commuting by private transport effectively has no risk of transmission from others ( $R_{e-c} = 0$ ). At the other  
extreme, commuting by crowded public transport can reduce feasible physical distancing ( $R_{e-c} = 2R_0$ ),  
254 both because individuals have a greater number of contacts while commuting and because these contacts  
potentially last for longer than normal. Transmission rates ( $\beta$ ) were back-calculated from  $R_e$  values, based  
256 on rearranging the expression  $R_e = \beta/\gamma$  to  $\beta = \gamma R_e$ . We assume that  $R_0$  and  $R_e$  values estimated for the

258 general public apply to our population of University workers. If instead our population had lower  
transmission rates than the general public under stay-at-home measures, going back to work could lead to  
faster pathogen spread than we predict here.

260

## Simulations

262 Since our aim was to understand the relative importance of model parameters on infection  
dynamics (rather than try to forecast outcomes), we started each simulation with one individual infected  
264 ( $I(t=0)=1$ ), zero exposed ( $E(t=0)=0$ ), zero removed ( $R(t=0)=0$ ), and the rest susceptible ( $S(t=0)=2,999$ ).  
Each simulation was run until it reached equilibrium (where the fraction of the population in the  $R$  class  
266 did not change from one day to the next). We defined a baseline set of values for each parameter (see  
Table 2). Then we ran the following simulations that varied some parameters while holding others  
268 constant:

(i) Varying transmission while at work ( $\beta_w$ ) and during the commutes ( $\beta_c$ ). We considered three  
270 scenarios that differed in the degree of risk of a commute to work and back. For low risk, we assumed  
low contact both during commutes and on campus ( $R_{e-w} = 0.5R_0 = 1.25$ , equivalent to at home). For  
272 moderate risk, we assumed unmitigated contact during commute ( $R_{e-c} = R_0 = 2.5$ , shared transport)  
and partial physical distancing at work ( $R_{e-w} = 0.75R_0 = 1.875$ , intermediate between home and  
274 unmitigated). For high risk, we assumed elevated contact during commute ( $R_{e-c} = 2R_0 = 5$ , crowded  
shared transport), and unmitigated contact at work ( $R_{e-w} = R_0 = 2.5$ ). These results are presented in Fig  
276 2.

(ii) Varying the fraction of the population commuting ( $\theta$ ) and fraction of the day spent on campus  
278 ( $T_w$ ). We considered eleven values of the fraction of the population commuting ( $\theta = 0, 0.1, \dots, 0.9, 1$ )  
and eleven values of the fraction of an 8-hour workday spent on campus ( $T_w = x(8/24)$  where  $x =$   
280  $0, 0.1, \dots, 0.9, 1$ ). These results are presented in Fig 3a.

(iii) Varying the fraction of the population commuting ( $\theta$ ) and fraction increase in transmission at  
282 work compared to home ( $R_{e-w}$ ). We considered eleven values of the fraction of the population  
commuting ( $\theta = 0, 0.1, \dots, 0.9, 1$ ) and eleven values of the fraction increase in transmission at work  
284 compared to at home ( $R_{e-w} = (1+x)R_{e-h}$  where  $x = 0, 0.1, \dots, 0.9, 1$ ). These results are presented in Fig 3b.  
(iv) Varying the fraction of the day spent on campus ( $T_w$ ) and fraction increase in transmission at  
286 work compared to home ( $R_{e-w}$ ). We considered eleven values of the fraction of an 8-hour workday  
spent on campus ( $T_w = y(8/24)$  where  $y = 0, 0.1, \dots, 0.9, 1$ ), and eleven values of the fraction increase in  
288 transmission at work compared to at home ( $R_{e-w} = (1+x)R_{e-h}$  where  $x = 0, 0.1, \dots, 0.9, 1$ ). These results  
are presented in Fig 3c.

290 Movement model simulations were conducted in Matlab 2018b.

292 **[Fig 2. Movement model: varying the degree of physical distancing on campus and during commutes.**

294 The fraction of the population that is Susceptible (S), Exposed (E), Infected (I), and Removed (R), when  
all individuals either work from home (solid lines) or commute to work on campus (dashed lines), for  
296 different degrees of physical distancing both on campus and during the commute: (a) low risk: low  
contact during commute and on campus ( $R_{e-c} = R_{e-w} = 0.5R_0 = 1.25$ , equivalent to at home), dashed and  
298 solid lines are identical, (b) moderate risk: unmitigated contact during commute ( $R_{e-c} = R_0 = 2.5$ , shared  
transport) and partial physical distancing at work ( $R_{e-w} = 0.75R_0 = 1.875$ , intermediate between home and  
300 unmitigated), (c) high risk: elevated contact during commute ( $R_{e-c} = 2R_0 = 5$ , crowded shared transport),  
and unmitigated contact at work ( $R_{e-w} = R_0 = 2.5$ ).]

302

**[Fig 3. Movement model: limiting people, time and contact on campus.**

304 The final epidemic size (cumulative fraction of the population infected) as a function of (a) the fraction of  
an 8-hour workday spent on campus (x-axis) and the fraction of the population working on campus (y-

306 axis) with no physical distancing, (b) the fraction increase in transmission while at work compared to at  
home (x-axis) and the fraction of the population working on campus (y-axis) with an 8-hour work day, (c)  
308 the fraction increase in transmission while at work compared to at home (x-axis) and the fraction of an 8-  
hour workday spent on campus (y-axis) with 100% of people on campus.]

310

## Sensitivity Analysis

312 Finally, we performed a sensitivity analysis to determine how sensitive the two model output  
metrics (final epidemic size, epidemic peak size) were to each of the model parameters, using a  
314 combination of Latin Hypercube Sampling (LHS) and Partial Rank Correlation Coefficients (PRCC). The  
LHS/PRCC sensitivity analysis is appropriate when the relationship between model output and each  
316 model parameter is monotonic and nonlinear [41]. For our model, this relationship was monotonic for all  
nine parameters considered ( $N$ ,  $T_c$ ,  $T_w$ ,  $\theta$ ,  $\sigma$ ,  $\gamma$ ,  $R_{e-c}$ ,  $R_{e-h}$ , and  $R_{e-w}$ ; S1-S2 Figs). The LHS/PRCC sensitivity  
318 analysis has two steps.

First, we used Latin Hypercube Sampling (LHS; [42]), a Monte Carlo approach, to generate sets  
320 of parameter value combinations from preset ranges of parameter values. LHS has a minimum required  
sample size ( $n$ ) which is given by:  $n \geq k+1$  or  $n \geq k(4/3)$  where  $k$  is the number of parameters included in  
322 the LHS [43], nine for our analysis. We chose the number of samples (see below) to meet these criteria.  
Each of the nine model parameters considered was sampled from a uniform probability density function  
324 based on the ranges given in Table 2. The model was run for each parameter value set, and the final  
epidemic size (cumulative fraction of the population infected, in the long-term) and epidemic peak size  
326 (maximum fraction of the population infected at any time) were both saved as output metrics.

Second, we measured the sensitivity of the output metrics to each parameter using Spearman  
328 Partial Rank Correlation Coefficients (PRCC). To determine how many samples of each parameter was  
needed to generate stable PRCC value, we calculated PRCC value for an increasing number of samples

330 (S3 Fig) and noted that the PRCC values were relatively stable past 1000 samples. Thus, we used 1000  
samples of each parameter value for our final PRCC analysis. A positive PRCC value indicates that  
332 increasing the value of that parameter increases the output metric while a negative PRCC value indicates  
that increasing the value of that parameter decreases the output metric. PRCC values that were not  
334 significant at the 0.05 level are marked with 'ns' in Fig 4 (not corrected for multiple comparisons).  
Finally, we used a z-test to rank significant model parameters in terms of their relative importance, since  
336 larger PRCC values do not always indicate more important parameters [41]. For our results (Fig 4), model  
output sensitivity was indeed given by the size of PRCC values.

338

#### [Fig 4. Movement model: sensitivity analysis.

340 The partial rank correlation coefficient (PRCC) values for each model parameter (Table 2) for the final  
epidemic size metric (blue bars) and the epidemic peak size metric (orange bars). Positive values indicate  
342 parameters that increase epidemic size as they are increased (negative values indicate parameters that  
decrease epidemic size as they are increased). Cases where the relationship between the parameter and  
344 model output metric was not significant are indicated with 'ns'.]

## 346 **Methods: network model**

Our second model explores infection dynamics as individuals work on campus either in both  
348 office and lab spaces or just in lab spaces. We created a network map of all the individuals housed in the  
Ecology building on the St. Paul campus of the University of Minnesota. We created our dataset by  
350 merging information on the office and lab room assignments for each individual with an office or lab in  
the building. (The methods for collection and analyses of these data were reviewed by the University of  
352 Minnesota's Institutional Review Board and were determined not to be human subjects research.) Work  
in the Ecology building is structured by two primary space types, laboratories that can include one to

354 three research groups, each associated with a single faculty member, and offices which can be single-  
occupancy or shared. Office space is generally shared by groups of graduate students and postdoctoral  
356 scholars, often from different lab groups. Because undergraduates are generally not permitted to work on  
campus during the resumption of research, we included faculty, staff, postdocs, and graduate students, but  
358 excluded all undergraduates from this visualization.

We considered two types of bipartite networks: shared office space and shared lab space.

360 Individuals sharing an office or a lab all had an edge with that location node. We then consider the one-  
mode projection of each network, creating a weighted unipartite network connecting individuals  
362 according to their shared spaces. The binary representation of these networks was used to create static  
network visualizations of connections among individuals using the igraph, tidygraph, and ggraph libraries  
364 in R [44–46], shown in Fig 5a and b. Animations of disease progression through the networks were  
produced using the ganimate library in R (S5-S6 Figs; [47]). For each network, we computed the  
366 distribution of (finite) shortest paths between each pair of nodes (Fig 5c) and for each distinct component  
of the networks, we noted its size (number of nodes), diameter (longest shortest path), and mean path  
368 length (average shortest path length; S7 Fig).

### 370 [Fig 5. Network model structure.

Space-sharing, or ‘contacts’ (edges) are shown among all individuals (nodes) for two scenarios: (a) when  
372 individuals at work share either office or lab spaces, or (b) when individuals only used shared lab space  
and not shared offices (e.g., bench work is done on campus while office work is done at home). (c)  
374 Histograms showing the distribution of shortest paths between all connected pairs of individuals.

Importantly, though all shortest paths between nodes in the network containing only links of shared lab  
376 spaces are less than or equal to three, the vast majority (approximately 95%) of pairwise combinations of  
individuals actually have no chain of interactions connecting them. In contrast, the combined network  
378 contains a component consisting of almost 90% of individuals in the network, corresponding to nearly



80% of all pairs of individuals having a chain of interactions connecting them.]

380

For the network simulations, we used an SEIR model framework, starting with a randomly  
382 selected index case to serve as the first infected individual in an entirely susceptible population (Fig 6).  
Simulations proceeded in discrete time. At each time step, individuals who had been exposed to the virus  
384 transitioned into the infectious class (E→I) based on the result of a Bernoulli trial using the disease  
progression rate as the probability of success. Likewise, currently infectious individuals were removed  
386 (i.e., either recovered and immune or deceased; I→R) based on the result of a Bernoulli trial using the  
recovery rate as the probability of success. Finally, one Bernoulli trial using the transmission rate as  
388 probability of success was conducted for each edge connecting a susceptible individual to an infectious  
one. Susceptible individuals became exposed (S→E) if at least one such trial resulted in success. At the  
390 end of each simulation, we took note of the epidemic peak size, the final epidemic size, and the time  
needed to reach the epidemic peak (Fig 7). We evaluated the sensitivity of these results by comparing them  
392 to simulations run on randomized versions of these empirical networks (S8 Supporting Information).  
Network analysis and simulations were conducted in R (Version 3.6.3).

394

**[Fig 6. Network model simulations.**

396 Final disease status of members of networks based on use of (a) both shared lab and office space and (c)  
only shared lab space, following a simulated epidemic with susceptible individuals in blue, exposed  
398 individuals in green, infectious individuals in orange, and removed individuals in red. (b, d) the  
cumulative number of susceptible, infectious, and removed individuals over time for each network  
400 simulation.]

402 **[Fig 7. Network model simulations.**

Outcome of 100 infection simulations on networks: the maximum peak number of individuals infected at

404 any one time (epidemic peak size), total number of individuals infected (final epidemic size), and time  
until peak number of individuals infected for simulations of pathogen spread on networks based on use of  
406 both shared lab and office space (blue) and only shared lab space (orange).]

408

## Results

410

### Movement model

412 Whether returning to work on campus affects the epidemic outcomes (measured as final epidemic  
size and epidemic peak size) depends critically on the degree of physical distancing maintained both on  
414 campus and during the commute between home and campus (Fig 2). If the current degree of physical  
distancing that is achieved while working from home can be maintained while on campus, then working  
416 from campus will not speed up infection dynamics compared to working from home (Fig 2a). However, if  
physical distancing on campus or during the commute is less successful than current physical distancing  
418 at home, then returning to work on campus will both increase the epidemic peak size in the short-term and  
increase the final epidemic size in the long term (Fig 2b-c). When physical distancing cannot be  
420 maintained on campus or during the commute, then infection dynamics can be kept slower by limiting the  
fraction of workers on campus and the amount of time workers are on campus (Fig 3a).

422 Intriguingly the three strategies we considered (limiting contact, people, or time on campus) are  
interchangeable with approximately equivalent effects on both the long-term metric, final epidemic size  
424 (Fig 3) and the short-term metric, epidemic peak size (S4 Fig). That is, in situations where one of these  
strategies cannot be fully implemented, a different strategy can be used in its stead. For example, if  
426 individuals need to be on campus for an extended period of time to run an experiment (thus limiting time

on campus is not a feasible strategy), this can be compensated for by limiting the number of other  
428 individuals on campus at the same time. However, of the three strategies, reducing the fraction of the  
population on campus had a bigger impact than reducing either time or contact on campus, due to the  
430 effect of commuting to and from campus. Regardless of time or physical distancing on campus, more  
people working on campus requires that more people commute. Thus, if commuting substantially  
432 increases transmission risk compared to staying at home (i.e., any form of shared transport vs. commuting  
alone), reducing the number of people commuting will be a more effective strategy than reducing either  
434 time or contact while on campus.

The sensitivity analysis revealed that both model metrics (final epidemic size, epidemic peak  
436 size) were most sensitive to transmission at home ( $R_{e-h}$ ), since most of the day is spent in that  
environment, as well as the fraction of the population commuting ( $\theta$ ) to campus (Fig 4). Transmission on  
438 campus ( $R_{e-w}$ ) and transmission during commutes ( $R_{e-c}$ ) were the next most influential; the first because  
most time during the workday is spent on campus and the second because we allowed transmission to  
440 vary across a wider range during commuting than on campus. The time spent on campus ( $T_w$ ) and time  
commuting ( $T_c$ ) were somewhat influential. For each of these parameters, increasing the parameter value  
442 increased the final and peak epidemic sizes. Finally, population size ( $N$ ) did not significantly affect either  
metric (but would be critical for the total number of individuals infected). The rate of moving from  
444 exposed to infected ( $\sigma$ ) and the recovery rate ( $\gamma$ ) did not significantly affect final epidemic size, but both  
had a minor effect on epidemic peak size: increasing  $\sigma$  (i.e., a shorter latent period) increased epidemic  
446 peak size, while increasing  $\gamma$  (i.e., a shorter infectious period) decreased epidemic peak size.

## 448 **Network model**

The mixing of researchers from different labs in shared office spaces had a substantial impact on  
450 the modularity of the resulting network. In particular, when people do not use shared office spaces (i.e.,

work from home if they share an office), but work on campus only in labs, the network is far more  
452 modular, with smaller, more densely connected groups and few connections among groups (Fig 5b, S7  
Fig). In this case, most individuals are directly connected to all other members of their group (i.e.,  
454 “shortest path” of one, Fig 5c); however the absence of connections between groups means that, on  
average, an infected individual lacks a path of connections to 95% of the rest of the population. In  
456 contrast, when individuals share both lab and office space, the connectedness of the network is relatively  
high because students, staff, and postdocs that share offices are often from different labs. For this  
458 combined case, most individuals are four or fewer connections from one another (Fig 5c) and the largest  
component contains nearly 90% of all individuals in the network (Fig 5a, S7 Fig). Thus, in the case where  
460 an infected individual (presumably pre-symptomatic or asymptomatic) came to work, the combined lab  
and office network has the potential for greater disease incidence than in the lab-only network, where the  
462 infection could be constrained to a single lab (Figs 6-7, S5-S6 Figs). In general, when compared to the  
combined network, the lab-only network had outbreaks that were less explosive (i.e., had less variance  
464 and a lower mean number of individuals infected at any one time), fewer individuals infected overall, and  
a shorter time until the peak number of infectious individuals (Fig 7).

466

## Discussion

468 Movement and contact behaviors are key drivers of the spread of pathogens like SARS-CoV-2,  
and not all movement and contacts have the same impact on pathogen spread. However, basic  
470 compartmental models used to describe SARS-CoV-2 dynamics assume all individuals move and contact  
each other at random (i.e., populations are well-mixed). Our models show how explicitly accounting for  
472 movement, space use in a building, and contact behaviors can provide a more nuanced understanding of  
relative risk. Our movement model, capturing the predictable movement between home and work/campus  
474 environments, shows that reducing the number of people, rate of contact, and amount of time spent on

campus are all equivalently effective strategies for slowing pathogen spread. However, if commutes  
476 specifically increase transmission risk (i.e., shared transport), reducing the number of people on campus is  
the most effective strategy to reduce the infection spread rate. We also considered heterogeneity in  
478 contact behavior once at the workplace; our network model captures the regular interactions among  
workers in shared workspaces on campus and shows that restricting building use to lab spaces (rather than  
480 lab and office space) may reduce pathogen spread. Our results provide a number of tools to distinguish  
among different movement and contact patterns at the scale of individuals and workplace communities.

482 A number of future directions could be explored, by changing some of our simplifying  
assumptions. First, staying within the broad structure of our model, alternative spatiotemporal strategies  
484 could be explored including: structured work weeks (e.g., four days on-campus and ten off; [48]), or  
further compartmentalizing time (e.g., sequential work shifts) or space (e.g., different buildings on  
486 campus). For instance, if evidence suggests that infection can occur through air circulation within  
buildings [49], these models could be altered to account for connections arising from shared ventilation  
488 systems. These models also could be modified to account for movement and contact behavior that  
explicitly depends on infection status [50]; e.g., splitting infected individuals into infectious but  
490 asymptomatic (who still potentially commute to work) and symptomatic individuals (who stay home) or  
building dynamic networks where contact behavior can change in response to infectious status (e.g.  
492 infectious and symptomatic individuals reducing their interpersonal contacts either through staying home  
or altering their behavior at work). Second, one could expand the scale of the model. This could be done  
494 foremost by combining the movement model (movement between work, commute, campus) with the  
network model (movement while on campus). Further expansions could consider both larger scales  
496 (linking in regional patterns) as well as smaller ones (allowing contacts within buildings to vary over  
time). For instance, integrating local models such as ours with regional variation in infection rates and  
498 degree of community social mixing [11,51,52] could further inform recommendations. Third, as data  
accumulate on transmission dynamics and individual susceptibility, we can alter specific players or

500 interactions in the model. For instance, while the virus can survive on surfaces [53], most transmission  
appears to be aerosolized, mediated by extended person-to-person interactions in close spaces [54–58], so  
502 masking and minimizing temporal and spatial overlap of workers in shared spaces is key [59–61]. In  
addition, susceptibility and thus local demographic data can provide additional layers of tailored  
504 recommendations [62].

Our findings mesh with concepts in the broader movement and disease ecology literature. Within  
506 movement ecology, there has long been a distinction between random/undirected movement like dispersal  
versus predictable movements like diel and seasonal migration [63]. Human movement between home  
508 and work is often a predictable and daily occurrence and thus is better viewed from the lens of predictable  
migratory movements (as we do here) rather than random dispersive ones (as implicit in basic  
510 compartmental models). Moving predictably between two environments does not always increase  
infection (either for individuals or at the population level) compared to remaining in a single location; the  
512 relative transmission in each environment is critical [22]. We find that transmission risk during a  
commute is key to infection dynamics when considering the impact of movement between home and  
514 work, paralleling recent work calling for the explicit consideration of how transient phases of movement  
affect infection dynamics [24] and theory showing that infection dynamics during transit can have a  
516 similar impact to dynamics in the second environment [64].

There are important insights that emerge from our movement and contact-network models that  
518 can guide policy. For example, basic disease models assume random movement and equal probability of  
contact, whereas many hosts, including humans, move in directed ways and in very structured social  
520 networks. For this reason, disease mitigation policies will likely be more effective when they consider  
disease risk in a more holistic way that integrates risk across the various components of a person's daily  
522 movement. For example, in settings where many people commute by mass transit (e.g., New York City),  
the efficacy of workplace safety protocols may be overwhelmed by transmission during daily commutes  
524 rather than contacts at work. Careful examination of social network patterns could also help guide policy

to provide intermediate scenarios between business as usual and complete lock down. For example, in our  
526 case-study contact rates and potential disease spread were significantly reduced when people’s contacts at  
the workplace were restricted to single lab groups, as opposed to linking separate lab and office networks.  
528 These findings are consistent with emerging calls to reduce COVID-19 spread by creating “learning  
pods” and “social bubbles” of interacting children and adults as schools and workplaces re-open [65,66].  
530 Even so, the protective effects of heterogeneity in contact structure should not be overemphasized  
for decision making. First, although the threshold for herd immunity can be lower in heterogeneous  
532 networks [67], making outbreaks less likely, outbreaks that do occur can also be more explosive [25].  
Second, because SARS-CoV-2 spread appears to be primarily by aerosolized transmission, the potential  
534 contact behaviors needed for transmission are more ubiquitous than for pathogens with more specific  
transmission modes (e.g., sexually transmitted diseases like HIV/AIDS). Importantly, the networks  
536 presented here consider only the room in which an employee works (their office or lab space), explicitly  
omitting broader workplace considerations like air flow, shared surfaces, entry points, etc., these  
538 additional points must be addressed in conjunction with thinking about explicit contact behavior when  
forming a public health strategy. Lastly, these static networks are a simplification of an inherently  
540 dynamic process of movement, contact, and infection. Using a time-ordered or dynamic network  
approach could provide better insights to actual duration of exposures and sickness-induced behavioral  
542 changes [68].

## 544 **Conclusions**

Human movement and contact behaviors are critical for the spread of pathogens like SARS-  
546 CoV-2, yet are rarely addressed explicitly in the current conversations about decision-making in the face  
of relaxing Stay at Home orders. Here we have drawn on movement and network models to demonstrate  
548 the effect of these behaviors. First, we have shown that regular movement between two ‘environments’

(i.e., work and home) does not inherently increase infection spread the way random dispersive  
550 movements might. Rather the outcome depends on the relative degree of transmission (e.g., degree of  
physical distancing) in each environment. Second, we have shown that different contact patterns (e.g.,  
552 space usage) within the work environment could lead to different outcomes in terms of SARS-CoV-2  
spread. In sum, we advocate for using an understanding of movement and contact patterns as an  
554 adjunctive approach (alongside widespread testing, contact tracing, vaccine development and other tools)  
to mitigate the effects of SARS-CoV-2 and COVID-19, particularly when considering return to work  
556 environments.

## 558 **Funding**

This material is based in part upon work supported by the University of Minnesota's Office of  
560 Academic Clinical Affairs COVID-19 Rapid Response Grant (<https://clinicalaffairs.umn.edu/umn-covid-19-research>) (to MEC, LAW, and MMS), by the National Science Foundation (<https://www.nsf.gov/>)  
562 under Grants DEB-2030509 (to MEC and MMS), DEB-1654609 (to AKS and MEC) and DEB-1556649  
(to EWS and ETB) and by the National Socio Environmental Synthesis Center (SESYNC) under funding  
564 received from the NSF DBI 1639145. The funders had no role in study design, data collection and  
analysis, decision to publish, or preparation of the manuscript. The funders had no role in study design,  
566 data collection and analysis, decision to publish, or preparation of the manuscript.

## 568 **Acknowledgements**

We thank William Harcombe for helpful feedback and discussion, and Valery Forbes, David  
570 Greenstein and Daniel Stanton for encouragement.



## 572 **Data Availability**

Model code and simulation output for the movement model is available on Data Dryad [69]. All Code to

574 generate the network model figures and animations is available on Github

(<https://github.com/whit1951/EEBCovid>).

## 576 **References**

1. Kraemer MUG, Yang C-H, Gutierrez B, Wu C-H, Klein B, Pigott DM, et al. The effect of human  
578 mobility and control measures on the COVID-19 epidemic in China. *Science*. 2020;368: 493–  
497. doi:10.1126/science.abb4218
- 580 2. Keeling MJ, Rohani P. *Modeling Infectious Diseases in Humans and Animals*. Princeton, NJ:  
Princeton University Press; 2008.
- 582 3. Keeling MJ, Grenfell BT. Individual-based perspectives on R0. *J Theor Biol*. 2000;203: 51–61.  
doi:10.1006/jtbi.1999.1064
- 584 4. Kucharski AJ, Russell TW, Diamond C, Liu Y, Edmunds J, Funk S, et al. Early dynamics of  
transmission and control of COVID-19: a mathematical modelling study. *Lancet Infect Dis*.  
586 2020;20: 553–558. doi:10.1016/S1473-3099(20)30144-4
5. Mizumoto K, Kagaya K, Zarebski A, Chowell G. Estimating the asymptomatic proportion of  
588 coronavirus disease 2019 (COVID-19) cases on board the Diamond Princess cruise ship,  
Yokohama, Japan, 2020. *Eurosurveillance*. 2020;25. doi:10.2807/1560-  
590 7917.ES.2020.25.10.2000180
6. Wu JT, Leung K, Bushman M, Kishore N, Niehus R, de Salazar PM, et al. Estimating clinical  
592 severity of COVID-19 from the transmission dynamics in Wuhan, China. *Nat Med*. 2020;26:  
506–510. doi:10.1038/s41591-020-0822-7
- 594 7. Moghadas SM, Shoukat A, Fitzpatrick MC, Wells CR, Sah P, Pandey A, et al. Projecting hospital  
utilization during the COVID-19 outbreaks in the United States. *Proc Natl Acad Sci*. 2020;117:  
596 9122–9126. doi:10.1073/pnas.2004064117
8. Duque D, Morton DP, Singh B, Du Z, Pasco R, Meyers LA. Timing social distancing to avert  
598 unmanageable COVID-19 hospital surges. *Proc Natl Acad Sci*. 2020;117: 19873–19878.  
doi:10.1073/pnas.2009033117

- 600 9. Lewnard JA, Lo NC. Scientific and ethical basis for social-distancing interventions against  
COVID-19. *Lancet Infect Dis.* 2020; S1473309920301900. doi:10.1016/S1473-3099(20)30190-0
- 602 10. Balilla J. Assessment of COVID-19 Mass Testing: The Case of South Korea. *SSRN Electron J.*  
2020 [cited 3 May 2020]. doi:10.2139/ssrn.3556346
- 604 11. Koo JR, Cook AR, Park M, Sun Y, Sun H, Lim JT, et al. Interventions to mitigate early spread of  
SARS-CoV-2 in Singapore: a modelling study. *Lancet Infect Dis.* 2020; S1473309920301626.  
606 doi:10.1016/S1473-3099(20)30162-6
12. Hadjidemetriou GM, Sasidharan M, Kouyialis G, Parlikad AK. The impact of government  
608 measures and human mobility trend on COVID-19 related deaths in the UK. *Transp Res  
Interdiscip Perspect.* 2020;6: 100167. doi:10.1016/j.trip.2020.100167
- 610 13. Zhang J, Litvinova M, Liang Y, Wang Y, Wang W, Zhao S, et al. Changes in contact patterns  
shape the dynamics of the COVID-19 outbreak in China. *Science.* 2020; eabb8001.  
612 doi:10.1126/science.abb8001
14. Brooks SK, Webster RK, Smith LE, Woodland L, Wessely S, Greenberg N, et al. The  
614 psychological impact of quarantine and how to reduce it: rapid review of the evidence. *The  
Lancet.* 2020;395: 912–920. doi:10.1016/S0140-6736(20)30460-8
- 616 15. Sønderskov KM, Dinesen PT, Santini ZI, Østergaard SD. The depressive state of Denmark during  
the COVID-19 pandemic. *Acta Neuropsychiatr.* 2020;32: 226–228. doi:10.1017/neu.2020.15
- 618 16. Viner RM, Russell SJ, Croker H, Packer J, Ward J, Stansfield C, et al. School closure and  
management practices during coronavirus outbreaks including COVID-19: a rapid systematic  
620 review. *Lancet Child Adolesc Health.* 2020;4: 397–404. doi:10.1016/S2352-4642(20)30095-X
17. Levinson M, Cevik M, Lipsitch M. Reopening primary schools during the pandemic. *N Engl J*  
622 *Med.* 2020; NEJMms2024920. doi:10.1056/NEJMms2024920
18. Paltiel AD, Zheng A, Walensky RP. Assessment of SARS-CoV-2 screening strategies to permit  
624 the safe Reopening of college campuses in the United States. *JAMA Netw Open.* 2020;3:

e2016818. doi:10.1001/jamanetworkopen.2020.16818

- 626 19. Binning SA, Shaw AK, Roche DG. Parasites and host performance: Incorporating infection into  
our understanding of animal movement. *Integr Comp Biol*. 2017;57: 267–280.
- 628 doi:10.1093/icb/icx024
20. Loehle C. Social barriers to pathogen transmission in wild animal populations. *Ecology*. 1995;76:  
630 326–335. doi:10.2307/1941192
21. Shaw AK, Binning SA. Recovery from infection is more likely to favour the evolution of  
632 migration than social escape from infection. *J Anim Ecol*. 2020;89: 1448–1457.  
doi:10.1111/1365-2656.13195
- 634 22. Shaw AK, Sherman J, Barker FK, Zuk M. Metrics matter: the effect of parasite richness, intensity  
and prevalence on the evolution of host migration. *Proc R Soc B Biol Sci*. 2018;285: 20182147.  
636 doi:10.1098/rspb.2018.2147
23. Boulinier T, Kada S, Ponchon A, Dupraz M, Dietrich M, Gamble A, et al. Migration, prospecting,  
638 dispersal? What host movement matters for infectious agent circulation? *Integr Comp Biol*.  
2016;56: 330–342. doi:10.1093/icb/icw015
- 640 24. Daversa DR, Fenton A, Dell AI, Garner TWJ, Manica A. Infections on the move: how transient  
phases of host movement influence disease spread. *Proc R Soc B Biol Sci*. 2017;284: 20171807.  
642 doi:10.1098/rspb.2017.1807
25. Keeling MJ, Eames KT. Networks and epidemic models. *J R Soc Interface*. 2005;2: 295–307.  
644 doi:10.1098/rsif.2005.0051
26. Altieri N, Barter RL, Duncan J, Dwivedi R, Kumbier K, Li X, et al. Curating a COVID-19 data  
646 repository and forecasting county-level death counts in the United States. medRxiv. 2020.  
Available: <https://arxiv.org/abs/2005.07882>
- 648 27. Woody S, Garcia Tec M, Dahan M, Gaither K, Lachmann M, Fox SJ, et al. Projections for first-  
wave COVID-19 deaths across the US using social-distancing measures derived from mobile

- 650 phones. *Infectious Diseases (except HIV/AIDS)*; 2020 Apr. doi:10.1101/2020.04.16.20068163
28. Kissler SM, Tedijanto C, Goldstein E, Grad YH, Lipsitch M. Projecting the transmission  
652 dynamics of SARS-CoV-2 through the postpandemic period. *Science*. 2020; eabb5793.  
doi:10.1126/science.abb5793
- 654 29. Chinazzi M, Davis JT, Ajelli M, Gioannini C, Litvinova M, Merler S, et al. The effect of travel  
restrictions on the spread of the 2019 novel coronavirus (COVID-19) outbreak. *Science*. 2020;  
656 eaba9757. doi:10.1126/science.aba9757
30. Prem K, Liu Y, Russell TW, Kucharski AJ, Eggo RM, Davies N, et al. The effect of control  
658 strategies to reduce social mixing on outcomes of the COVID-19 epidemic in Wuhan, China: a  
modelling study. *Lancet Public Health*. 2020;5: e261–e270. doi:10.1016/S2468-2667(20)30073-6
- 660 31. Tian L, Li X, Qi F, Tang Q-Y, Tang V, Liu J, et al. Calibrated intervention and containment of  
the COVID-19 pandemic. preprint. 2020; 31. [https://covid-](https://covid-19.conacyt.mx/jspui/bitstream/1000/4645/1/1106972.pdf)  
662 [19.conacyt.mx/jspui/bitstream/1000/4645/1/1106972.pdf](https://covid-19.conacyt.mx/jspui/bitstream/1000/4645/1/1106972.pdf)
32. MN Department of Health. Situation Update for Coronavirus Disease 2019 (COVID-19). 2020.  
664 Available: <https://www.health.state.mn.us/diseases/coronavirus/situation.html#cases1>
33. Wei WE, Li Z, Chiew CJ, Yong SE, Toh MP, Lee VJ. Presymptomatic transmission of SARS-  
666 CoV-2 — Singapore, January 23–March 16, 2020. *MMWR Morb Mortal Wkly Rep*. 2020;69:  
411–415. doi:10.15585/mmwr.mm6914e1
- 668 34. Servedio MR, Brandvain Y, Dhole S, Fitzpatrick CL, Goldberg EE, Stern CA, et al. Not just a  
theory—The utility of mathematical models in evolutionary biology. *PLoS Biol*. 2014;12:  
670 e1002017.
35. Johns S, Shaw AK. Theoretical insight into three disease-related benefits of migration. *Popul*  
672 *Ecol*. 2016;58: 213–221. doi:10.1007/s10144-015-0518-x
36. Begon M, Bennett M, Bowers RG, French NP, Hazel SM, Turner J. A clarification of  
674 transmission terms in host-microparasite models: numbers, densities and areas. *Epidemiol Infect*.

2002;129: 147–153. doi:10.1017/S0950268802007148

- 676 37. Sanche S, Lin YT, Xu C, Romero-Severson E, Hengartner N, Ke R. High Contagiousness and  
Rapid Spread of Severe Acute Respiratory Syndrome Coronavirus 2. *Emerg Infect Dis.* 2020;26:  
678 doi:10.3201/eid2607.200282
38. Ling Y, Xu S-B, Lin Y-X, Tian D, Zhu Z-Q, Dai F-H, et al. Persistence and clearance of viral  
680 RNA in 2019 novel coronavirus disease rehabilitation patients: *Chin Med J (Engl)*. 2020;133:  
1039–1043. doi:10.1097/CM9.0000000000000774
- 682 39. Zhang S, Diao M, Yu W, Pei L, Lin Z, Chen D. Estimation of the reproductive number of novel  
coronavirus (COVID-19) and the probable outbreak size on the Diamond Princess cruise ship: A  
684 data-driven analysis. *Int J Infect Dis.* 2020;93: 201–204. doi:10.1016/j.ijid.2020.02.033
40. Enns EA, Kirkeide M, Mehta A, MacLehose R, Knowlton GS, Smith MK, et al. Modeling the  
686 impact of social distancing measures on the spread of SARS-CoV-2 in Minnesota. MN  
Department of Health; 2020 Apr p. 16. Available: Enns EA, Kirkeide M, Mehta A, MacLehose  
688 R, Knowlton GS, Smith [https://mn.gov/covid19/assets/MNmodel\\_tech\\_doc\\_tcm1148-427724.pdf](https://mn.gov/covid19/assets/MNmodel_tech_doc_tcm1148-427724.pdf)
41. Marino S, Hogue IB, Ray CJ, Kirschner DE. A methodology for performing global uncertainty  
690 and sensitivity analysis in systems biology. *J Theor Biol.* 2008;254: 178–196.  
doi:10.1016/j.jtbi.2008.04.011
- 692 42. Mckay MD, Beckman RJ, Conover WJ. A comparison of three methods for selecting values of  
input variables in the analysis of output from a computer code. *Technometrics.* 1979;42: 55–61.  
694 doi:10.1080/00401706.2000.10485979
43. Blower SM, Dowlatabadi H. Sensitivity and Uncertainty Analysis of Complex Models of Disease  
696 Transmission: An HIV Model, as an Example. *Int Stat Rev Rev Int Stat.* 1994;62: 229.  
doi:10.2307/1403510
- 698 44. Csárdi G, Nepusz T. The igraph software package for complex network research. *InterJournal  
Complex Syst.* 2006;1695: 9.

- 700 45. Pedersen TL. tidygraph: A Tidy API for Graph Manipulation. 2019. Available: <https://CRAN.R-project.org/package=tidygraph>
- 702 46. Pedersen TL. ggraph: An Implementation of Grammar of Graphics for Graphs and Networks. 2020. Available: <https://CRAN.R-project.org/package=ggraph>
- 704 47. Pedersen TL, Robinson D. ganimate: A Grammar of Animated Graphics. 2020. Available: <https://CRAN.R-project.org/package=ganimate>
- 706 48. Karin O, Bar-On YM, Milo T, Katzir I, Mayo A, Korem Y, et al. Cyclic exit strategies to suppress COVID-19 and allow economic activity. medRxiv. 2020 [cited 13 May 2020]. doi:10.1101/2020.04.04.20053579
- 708 49. Lu J, Gu J, Li K, Xu C, Su W, Lai Z, et al. COVID-19 Outbreak Associated with Air Conditioning in Restaurant, Guangzhou, China, 2020. Emerg Infect Dis. 2020;26. doi:10.3201/eid2607.200764
- 710 50. Naven Narayanan, Binning SA, Shaw AK. Infection state can affect host migratory decisions. Oikos. in press. <https://onlinelibrary.wiley.com/doi/abs/10.1111/oik.07188>
- 712 51. Dong E, Du H, Gardner L. An interactive web-based dashboard to track COVID-19 in real time. Lancet Infect Dis. 2020;20: 533–534. doi:10.1016/S1473-3099(20)30120-1
- 714 52. Zhang J, Litvinova M, Liang Y, Zheng W, Shi H, Vespignani A, et al. The impact of relaxing interventions on human contact patterns and SARS-CoV-2 transmission in China. medRxiv. 2020 [cited 31 Aug 2020]. doi:10.1101/2020.08.03.20167056
- 716 53. van Doremalen N, Bushmaker T, Morris DH, Holbrook MG, Gamble A, Williamson BN, et al. Aerosol and surface stability of SARS-CoV-2 as compared with SARS-CoV-1. N Engl J Med. 2020;382: 1564–1567. doi:10.1056/NEJMc2004973
- 718 54. Ghinai I, Woods S, Ritger KA, McPherson TD, Black SR, Sparrow L, et al. Community Transmission of SARS-CoV-2 at Two Family Gatherings — Chicago, Illinois, February–March 2020. MMWR Morb Mortal Wkly Rep. 2020;69: 446–450. doi:10.15585/mmwr.mm6915e1
- 720 722 724

55. Li W, Zhang B, Lu J, Liu S, Chang Z, Cao P, et al. The characteristics of household transmission  
726 of COVID-19. *Clin Infect Dis*. 2020; ciaa450. doi:10.1093/cid/ciaa450
56. Bi Q, Wu Y, Mei S, Ye C, Zou X, Zhang Z, et al. Epidemiology and transmission of COVID-19  
728 in 391 cases and 1286 of their close contacts in Shenzhen, China: a retrospective cohort study.  
*Lancet Infect Dis*. 2020; S1473309920302875. doi:10.1016/S1473-3099(20)30287-5
- 730 57. Morawska L, Cao J. Airborne transmission of SARS-CoV-2: The world should face the reality.  
*Environ Int*. 2020;139: 105730. doi:10.1016/j.envint.2020.105730
- 732 58. Liu Y, Ning Z, Chen Y, Guo M, Liu Y, Gali NK, et al. Aerodynamic analysis of SARS-CoV-2 in  
two Wuhan hospitals. *Nature*. 2020;582: 557–560. doi:10.1038/s41586-020-2271-3
- 734 59. Qian H, Miao T, Liu L, Zheng X, Luo D, Li Y. Indoor transmission of SARS-CoV-2. medRxiv.  
2020 [cited 11 May 2020]. doi:10.1101/2020.04.04.20053058
- 736 60. Chu DK, Akl EA, Duda S, Solo K, Yaacoub S, Schünemann HJ, et al. Physical distancing, face  
masks, and eye protection to prevent person-to-person transmission of SARS-CoV-2 and  
738 COVID-19: a systematic review and meta-analysis. *The Lancet*. 2020;395: 1973–1987.  
doi:10.1016/S0140-6736(20)31142-9
- 740 61. Prather KA, Wang CC, Schooley RT. Reducing transmission of SARS-CoV-2. *Science*.  
2020;368: 1422–1424. doi:10.1126/science.abc6197
- 742 62. Dowd JB, Andriano L, Brazel DM, Rotondi V, Block P, Ding X, et al. Demographic science aids  
in understanding the spread and fatality rates of COVID-19. *Proc Natl Acad Sci*. 2020;117: 9696–  
744 9698. doi:10.1073/pnas.2004911117
63. Heape W. *Emigration, Migration and Nomadism*. Cambridge, UK: Heffer and Sons; 1931.
- 746 64. Shaw AK, Craft ME, Zuk M, Binning SA. Host migration strategy is shaped by forms of parasite  
transmission and infection cost. *J Anim Ecol*. 2019;88: 1601–1612. doi:10.1111/1365-  
748 2656.13050
65. Block P, Hoffman M, Raabe IJ, Dowd JB, Rahal C, Kashyap R, et al. Social network-based



- 750 distancing strategies to flatten the COVID-19 curve in a post-lockdown world. *Nat Hum Behav.*  
2020;4: 588–596. doi:10.1038/s41562-020-0898-6
- 752 66. Moyer MW. Pods, Microschools and Tutors: Can Parents Solve the Education Crisis on Their  
Own? *N Y Times.* 2020; 5. <https://covid-19.conacyt.mx/jspui/bitstream/1000/4645/1/1106972.pdf>
- 754 67. Britton T, Ball F, Trapman P. A mathematical model reveals the influence of population  
heterogeneity on herd immunity to SARS-CoV-2. *Science.* 2020;369: 846–849.  
756 doi:10.1126/science.abc6810
68. Enright J, Kao RR. Epidemics on dynamic networks. *Epidemics.* 2018;24: 88–97.  
758 doi:10.1016/j.epidem.2018.04.003
69. Shaw AK, White LA, Michalska-Smith M, Borer ET, Craft ME, Seabloom EW, et al. Data from:  
760 Lessons from movement ecology for the return to work: modeling contacts and the spread of  
COVID-19. 2020. Available: <https://doi.org/10.5061/dryad.pg4f4qrmj>

762 Table 1. Movement model state variables and their meaning.

| Variable | Meaning                                                                                  |
|----------|------------------------------------------------------------------------------------------|
| $S$      | Total number of susceptible individuals                                                  |
| $E$      | Total number of exposed individuals                                                      |
| $I$      | Total number of infected individuals                                                     |
| $R$      | Total number of removed individuals                                                      |
| $S_c$    | Number of susceptible individuals commuting to campus (during the commute phases)        |
| $E_c$    | Number of exposed individuals commuting to campus (during the commute phases)            |
| $I_c$    | Number of infected individuals commuting to campus (during the commute phases)           |
| $R_c$    | Number of removed individuals commuting to campus (during the commute phases)            |
| $S_w$    | Number of susceptible individuals working from work (during the work phase)              |
| $E_w$    | Number of exposed individuals working from work (during the work phase)                  |
| $I_w$    | Number of infected individuals working from work (during the work phase)                 |
| $R_w$    | Number of removed individuals working from work (during the work phase)                  |
| $S_h$    | Number of susceptible individuals working from home (during the commute and work phases) |

|       |                                                                                        |
|-------|----------------------------------------------------------------------------------------|
| $E_h$ | Number of exposed individuals working from home (during the commute and work phases)   |
| $I_h$ | Number of infected individuals working from home (during the commute and work phases)  |
| $R_h$ | Number of recovered individuals working from home (during the commute and work phases) |

764



Table 2. Movement model parameters, meaning, and default value (with units).

| Parameter | Meaning                                                                                               | Default values<br>[Units]                | Sensitivity<br>analysis range |
|-----------|-------------------------------------------------------------------------------------------------------|------------------------------------------|-------------------------------|
| $N$       | Population size                                                                                       | 3000 [people]                            | (1500 to 6000)                |
| $R_0$     | Basic reproductive number (number of new infections that each infection generates)                    | 2.5 [unitless] [39]                      | fixed                         |
| $R_{e-c}$ | Effective reproductive number while commuting between work and campus                                 | $R_0$ [unitless]                         | (1 to $4 R_0$ )               |
| $R_{e-h}$ | Effective reproductive number while at home                                                           | $0.5R_0$ [unitless] [40]                 | ( $0.25 R_0$ to $R_0$ )       |
| $R_{e-w}$ | Effective reproductive number while at work at campus                                                 | $R_0$ [unitless]                         | ( $0.5 R_0$ to $2 R_0$ )      |
| $T_c$     | Fraction of a 24-hour day spent commuting each way for those that commute to campus                   | $1/24$ [unitless]                        | ( $0.5/24$ to $2/24$ )        |
| $T_h$     | Fraction of a 24-hour day spent not working (everyone is off campus)                                  | $= 1 - 2 T_c - T_w$<br>[unitless]        | $= 1 - 2 T_c - T_w$           |
| $T_w$     | Fraction of a 24-hour day spent at work on campus for those commuting (some individual are on campus) | $8/24$ [unitless]                        | ( $2/24$ to $12/24$ )         |
| $\beta_c$ | Transmission rate while commuting                                                                     | $= \gamma R_{e-c}$ [ $\text{day}^{-1}$ ] | $= \gamma R_{e-c}$            |

|           |                                                                                                       |                                         |                    |
|-----------|-------------------------------------------------------------------------------------------------------|-----------------------------------------|--------------------|
| $\beta_h$ | Transmission rate while at home                                                                       | $= \gamma R_{e-h}$ [day <sup>-1</sup> ] | $= \gamma R_{e-h}$ |
| $\beta_w$ | Transmission rate while at work                                                                       | $= \gamma R_{e-w}$ [day <sup>-1</sup> ] | $= \gamma R_{e-w}$ |
| $\sigma$  | Rate of moving from exposed to infected (inverse of the latent period)                                | 1/4.2 [day <sup>-1</sup> ] [37]         | (1/5.1 to 1/3.5)   |
| $\gamma$  | Recovery rate                                                                                         | 1/9.5 [day <sup>-1</sup> ] [38]         | (1/11 to 1/6)      |
| $\theta$  | Fraction of the campus population commuting to work on campus (instead of continuing to work at home) | 1 [unitless]                            | (0.0001 to 1)      |

768

## **SUPPORTING INFORMATION FIGURE CAPTIONS**

770

### **S1 Fig. Movement model monotonicity plots.**

772 The relationship between each of the nine model parameters (x-axis) and the model output, final epidemic  
size (y-axis) for (a) population size ( $N$ ); (b) fraction of a 24-hour day spent commuting each way for those  
774 that commute to campus ( $T_c$ ); (c) fraction of a 24-hour day spent on campus for those commuting ( $T_w$ );  
(d) fraction of the campus population commuting to work on campus ( $\theta$ ); (e) recovery rate ( $\gamma$ ); (f)  
776 effective reproductive number while at home ( $R_{e-h}$ ); (g) effective reproductive number while commuting  
between work and campus ( $R_{e-c}$ ); and (h) effective reproductive number while at work on campus ( $R_{e-w}$ ).

778

### **S2 Fig. Movement model monotonicity plots.**

780 The relationship between each of the nine model parameters (x-axis) and the model output, epidemic peak  
size (y-axis) for (a) population size ( $N$ ); (b) fraction of a 24-hour day spent commuting each way for those  
782 that commute to campus ( $T_c$ ); (c) fraction of a 24-hour day spent on campus for those commuting ( $T_w$ );  
(d) fraction of the campus population commuting to work on campus ( $\square$ ); (e) recovery rate ( $\gamma$ ); (F)  
784 effective reproductive number while at home ( $R_{e-h}$ ); (g) effective reproductive number while commuting  
between work and campus ( $R_{e-c}$ ); and (h) effective reproductive number while at work on campus ( $R_{e-w}$ ).

786

### **S3 Fig. Movement model sample numbers.**

788 Absolute value of PRCC for the final epidemic size model output and each of the nine model parameters  
( $N$ ,  $T_c$ ,  $T_w$ ,  $\square$ ,  $\sigma$ ,  $\gamma$ ,  $R_{e-h}$ ,  $R_{e-c}$ ,  $R_{e-w}$ ) as a function of different numbers of LHS samples generated. The  
790 results seem to stabilize after about 1000 samples.

### **792 S4 Fig. Movement model: limiting people, time and contact on campus.**

The epidemic peak size (maximum fraction of the population infected) as a function of (a) the fraction of

794 an 8-hour workday spent on campus (x-axis) and the fraction of the population working on campus (y-  
axis) with no physical distancing, (b) the fraction increase in transmission while at work compared to at  
796 home (x-axis) and the fraction of the population working on campus (y-axis) with an 8-hour work day, (c)  
the fraction increase in transmission while at work compared to at home (x-axis) and the fraction of an 8-  
798 hour workday spent on campus (y-axis) with 100% of people on campus.

800 **S5 Fig. Network model simulations.**

Simulations of pathogen spread across networks based on use of both shared office and lab space.

802

**S6 Fig. Network model simulations.**

804 Simulations of pathogen spread across networks based on use of only shared lab space.

806 **S7 Fig. Component-wise network structural metrics.**

Measures of the size (number of individuals), diameter (longest shortest path between two individuals),

808 and mean path length (average shortest path length between individuals) for each distinct component of  
networks presented in Fig 5a,b. The combined lab and office network (blue points) has 8 distinct

810 components (8 points for each metric), while the shared lab space network contains 31 distinct  
components (31 points for each metric).

812

**S8 Supporting Information.**

814 Sensitivity analysis of the network model and results.



It is made available under a [CC-BY-NC-ND 4.0 International license](https://creativecommons.org/licenses/by-nc-nd/4.0/).

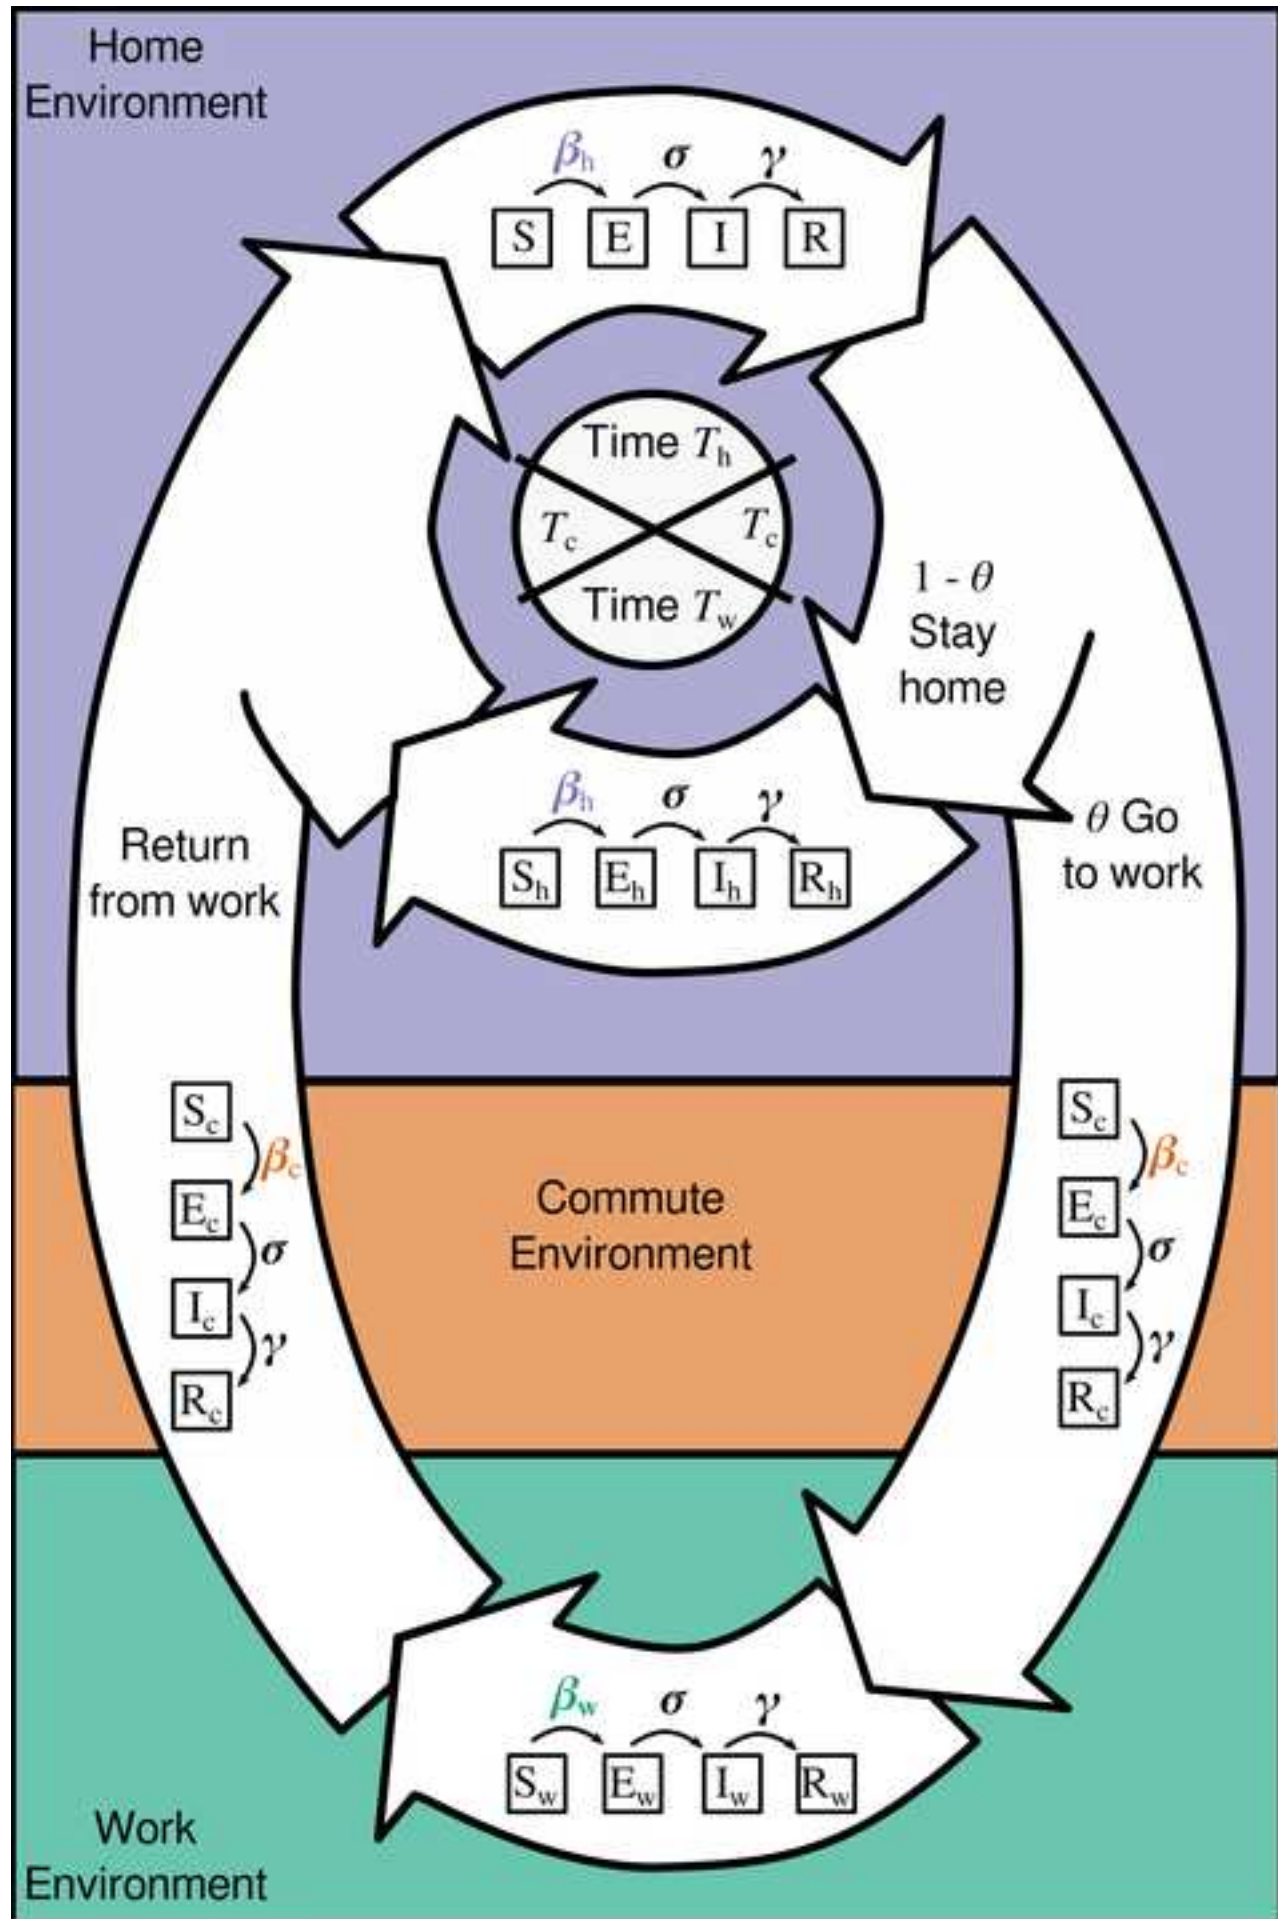

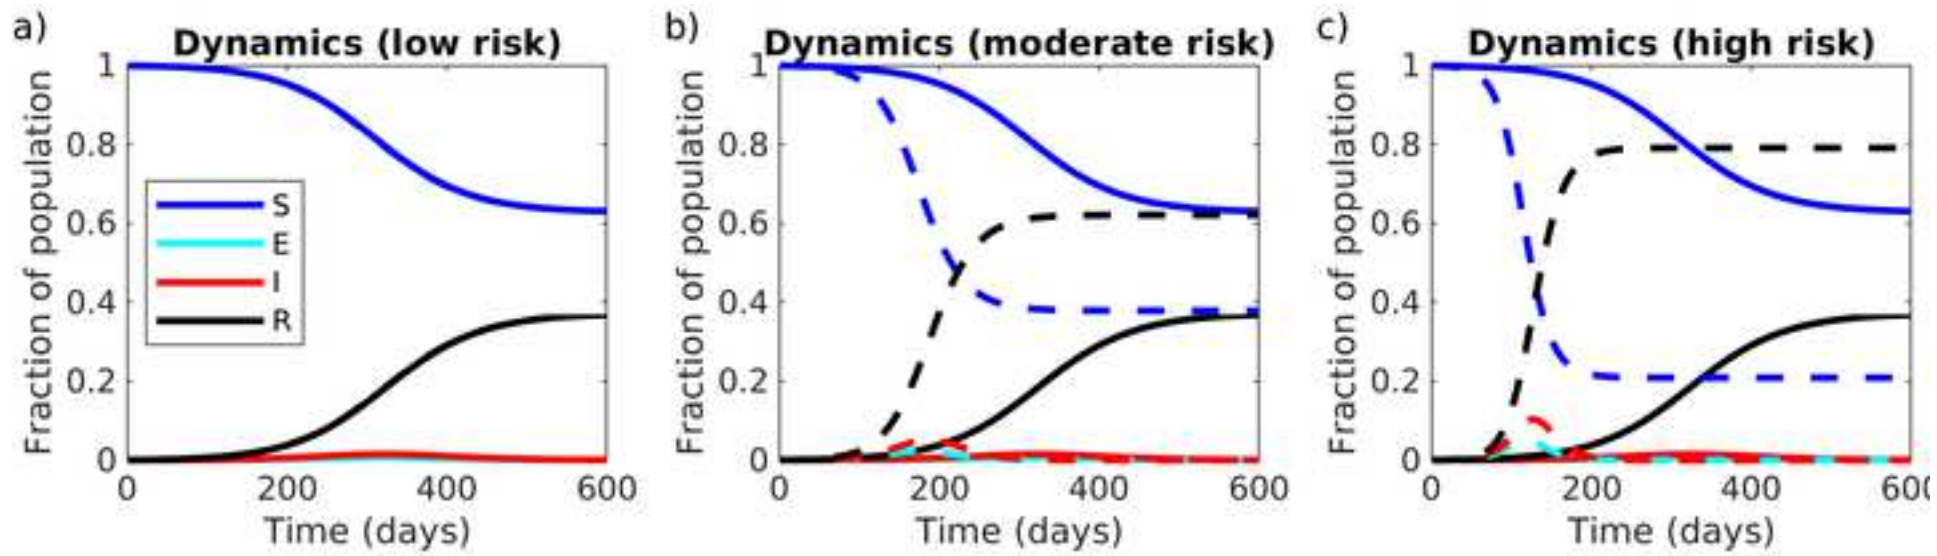

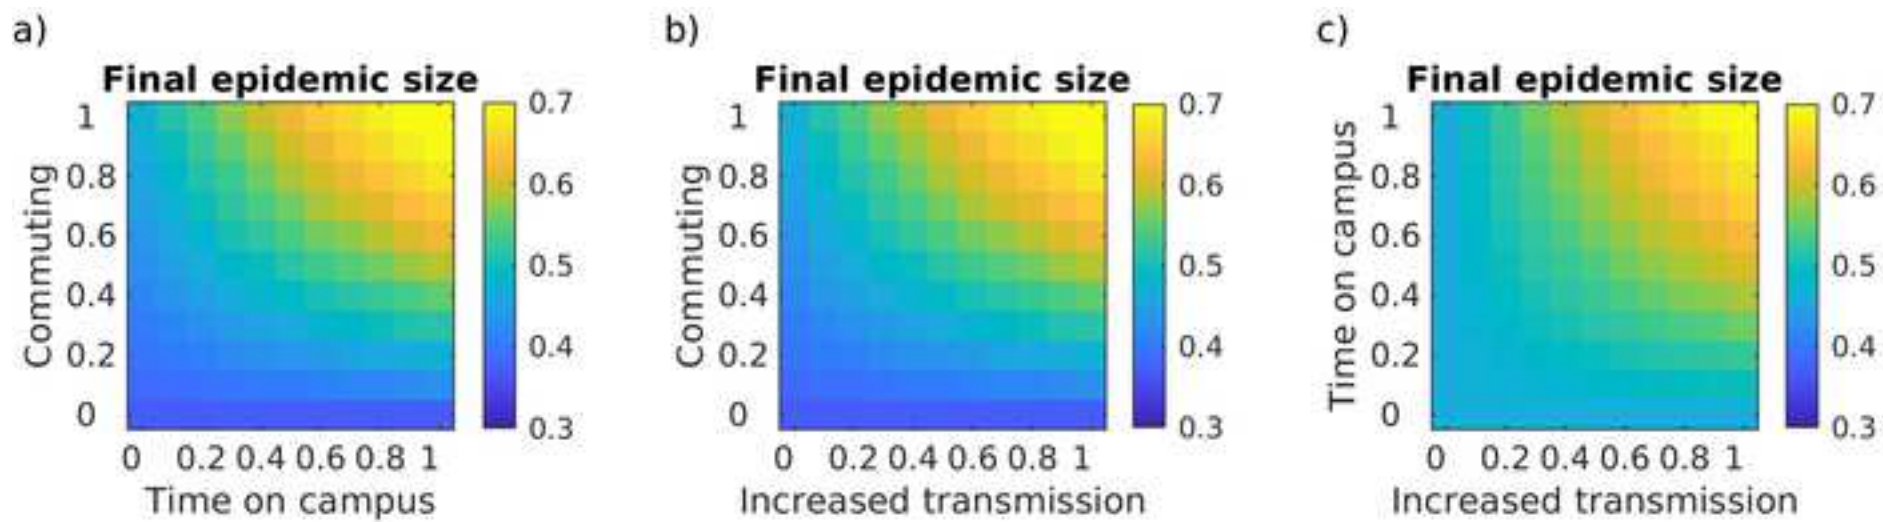

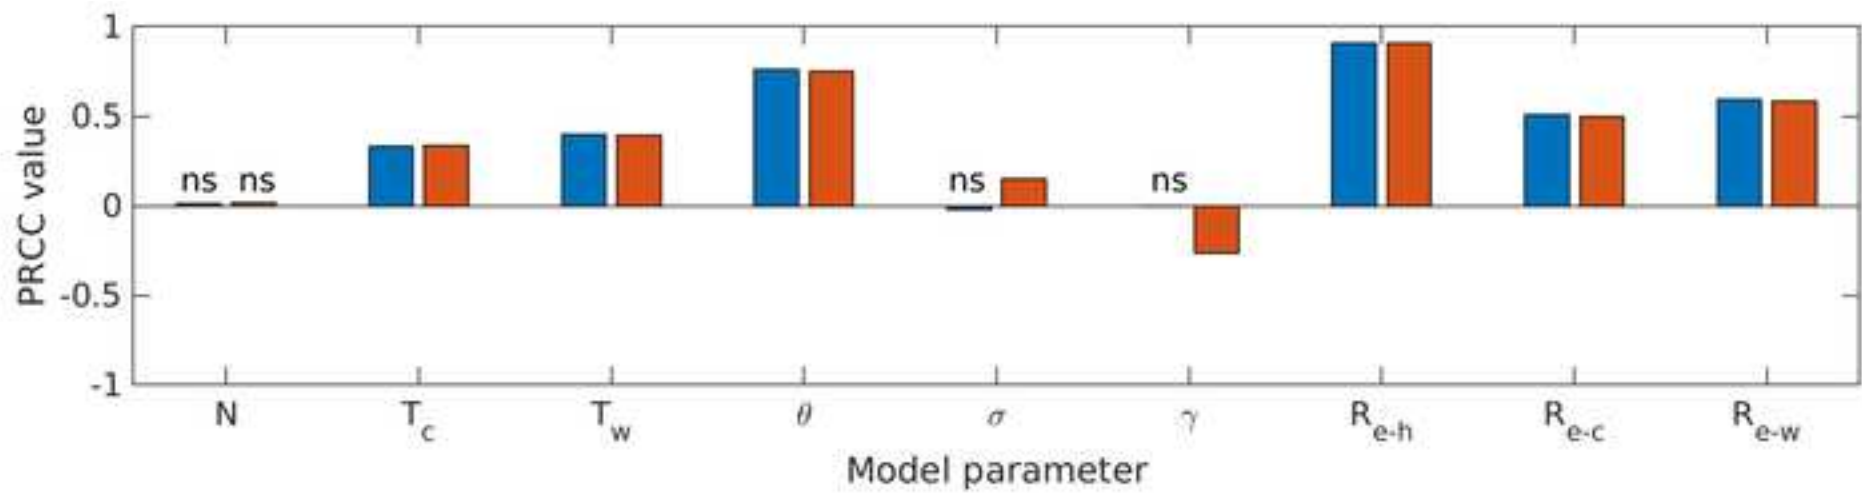

**A) Combined Lab and Office**

8 distinct components

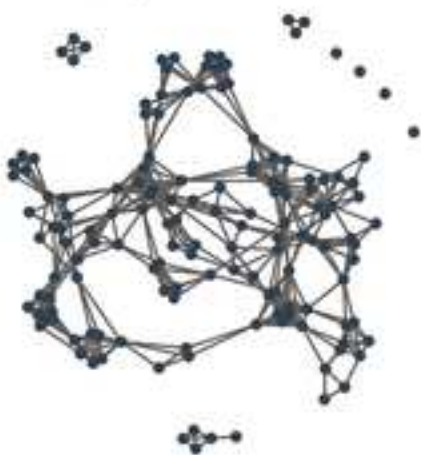**B) Just Shared Labspace**

31 distinct components

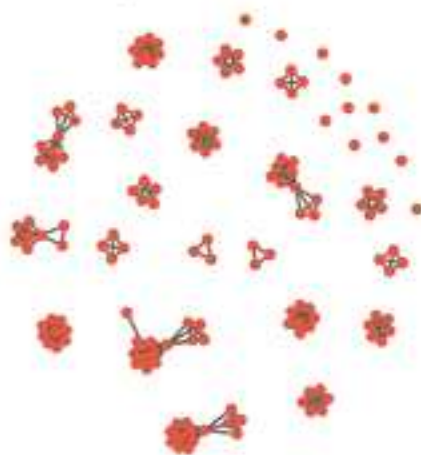**C) Distribution of shortest paths**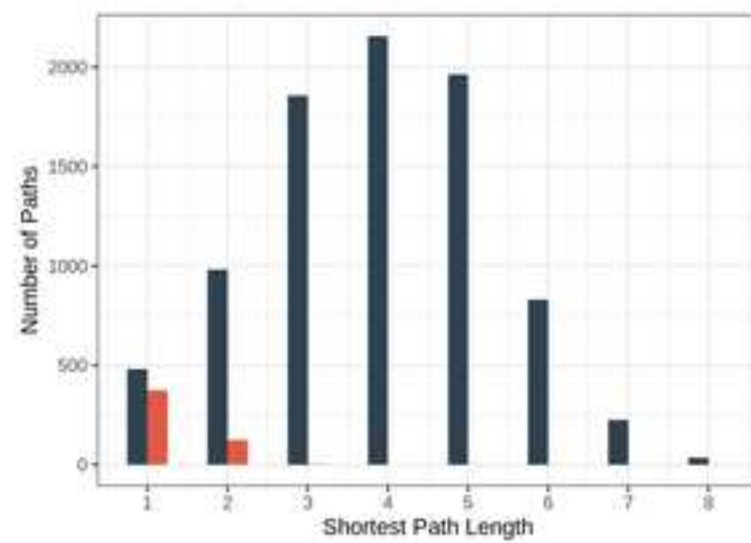

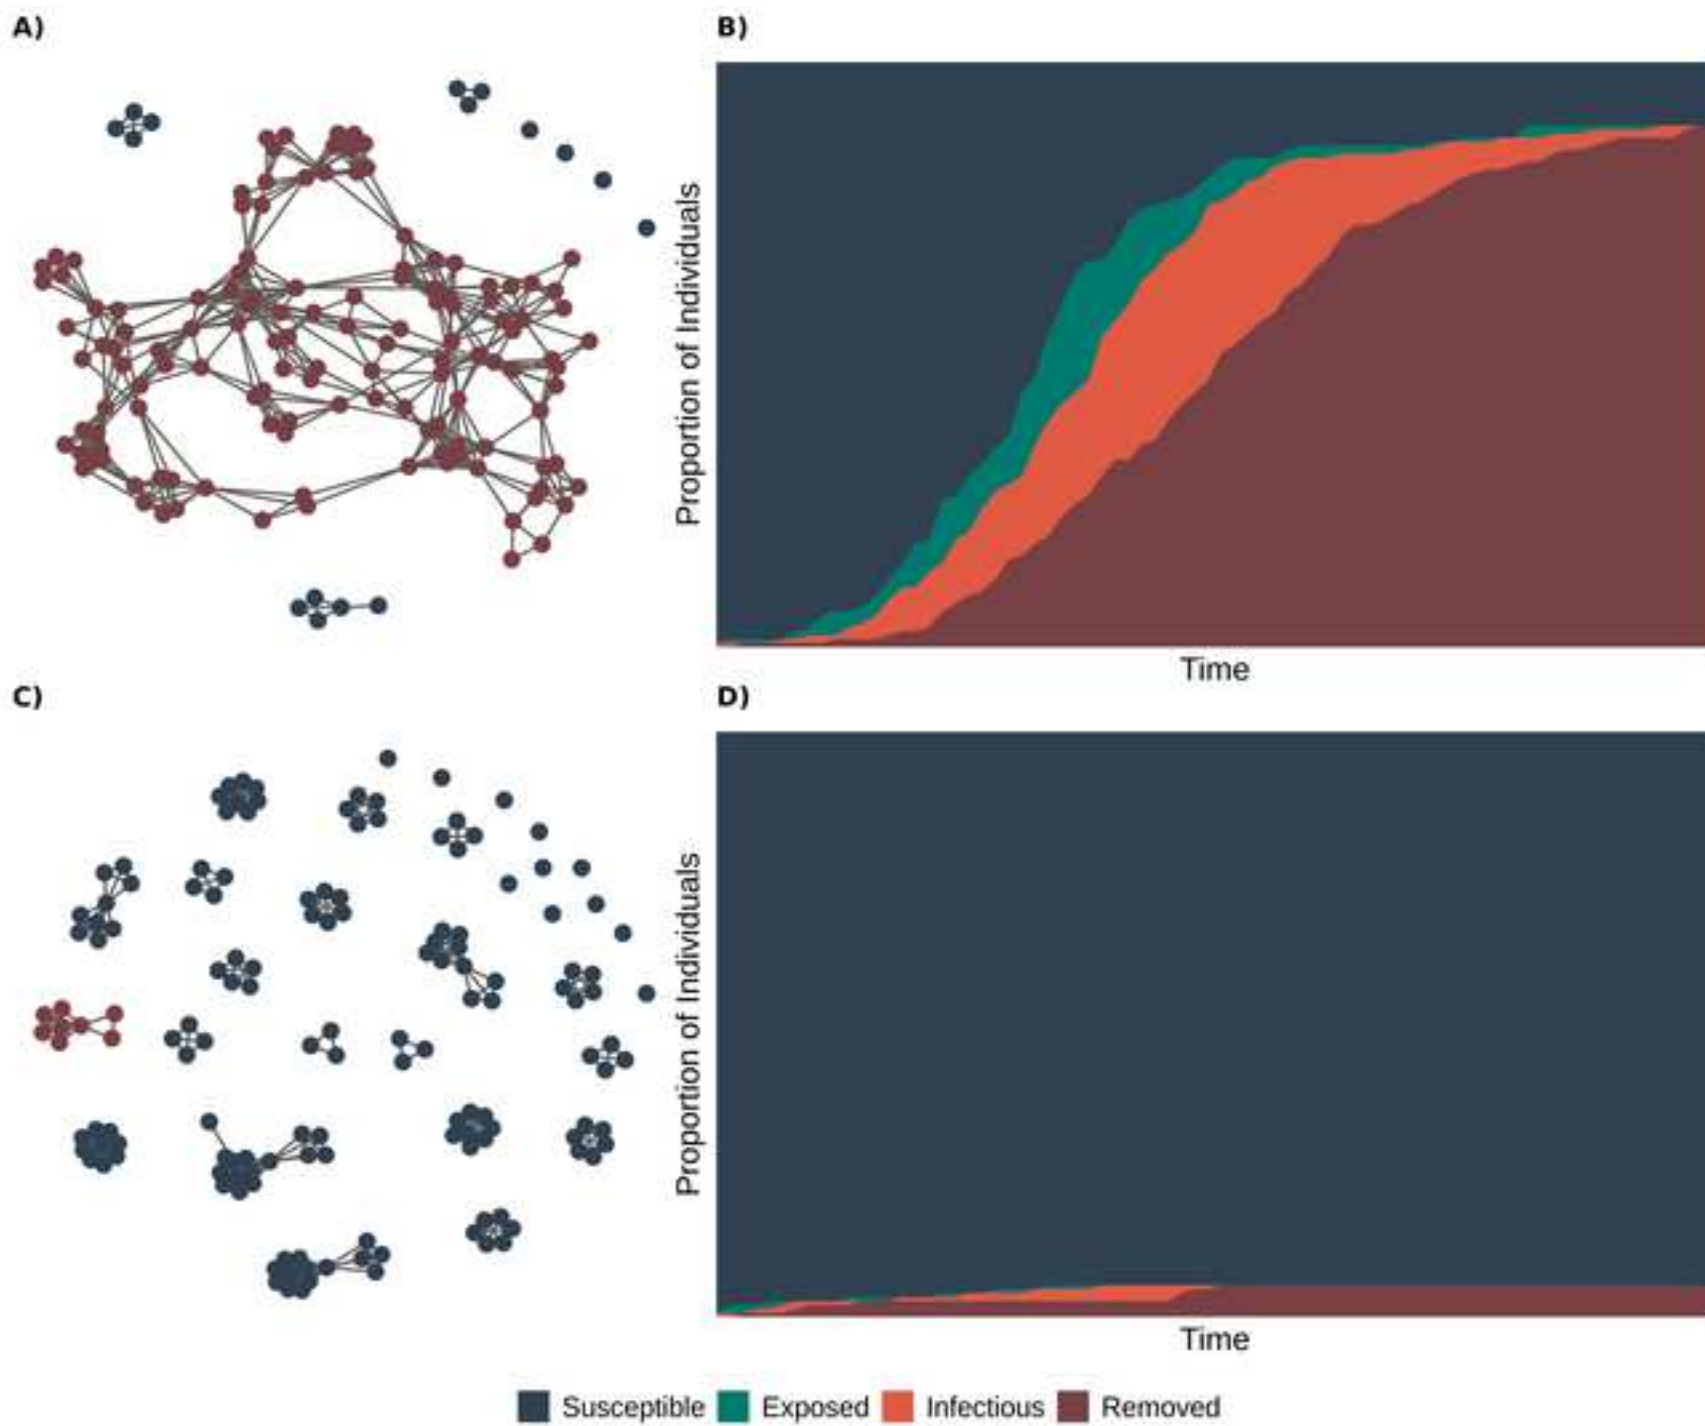

It is made available under a [CC-BY-NC-ND 4.0 International license](#) .

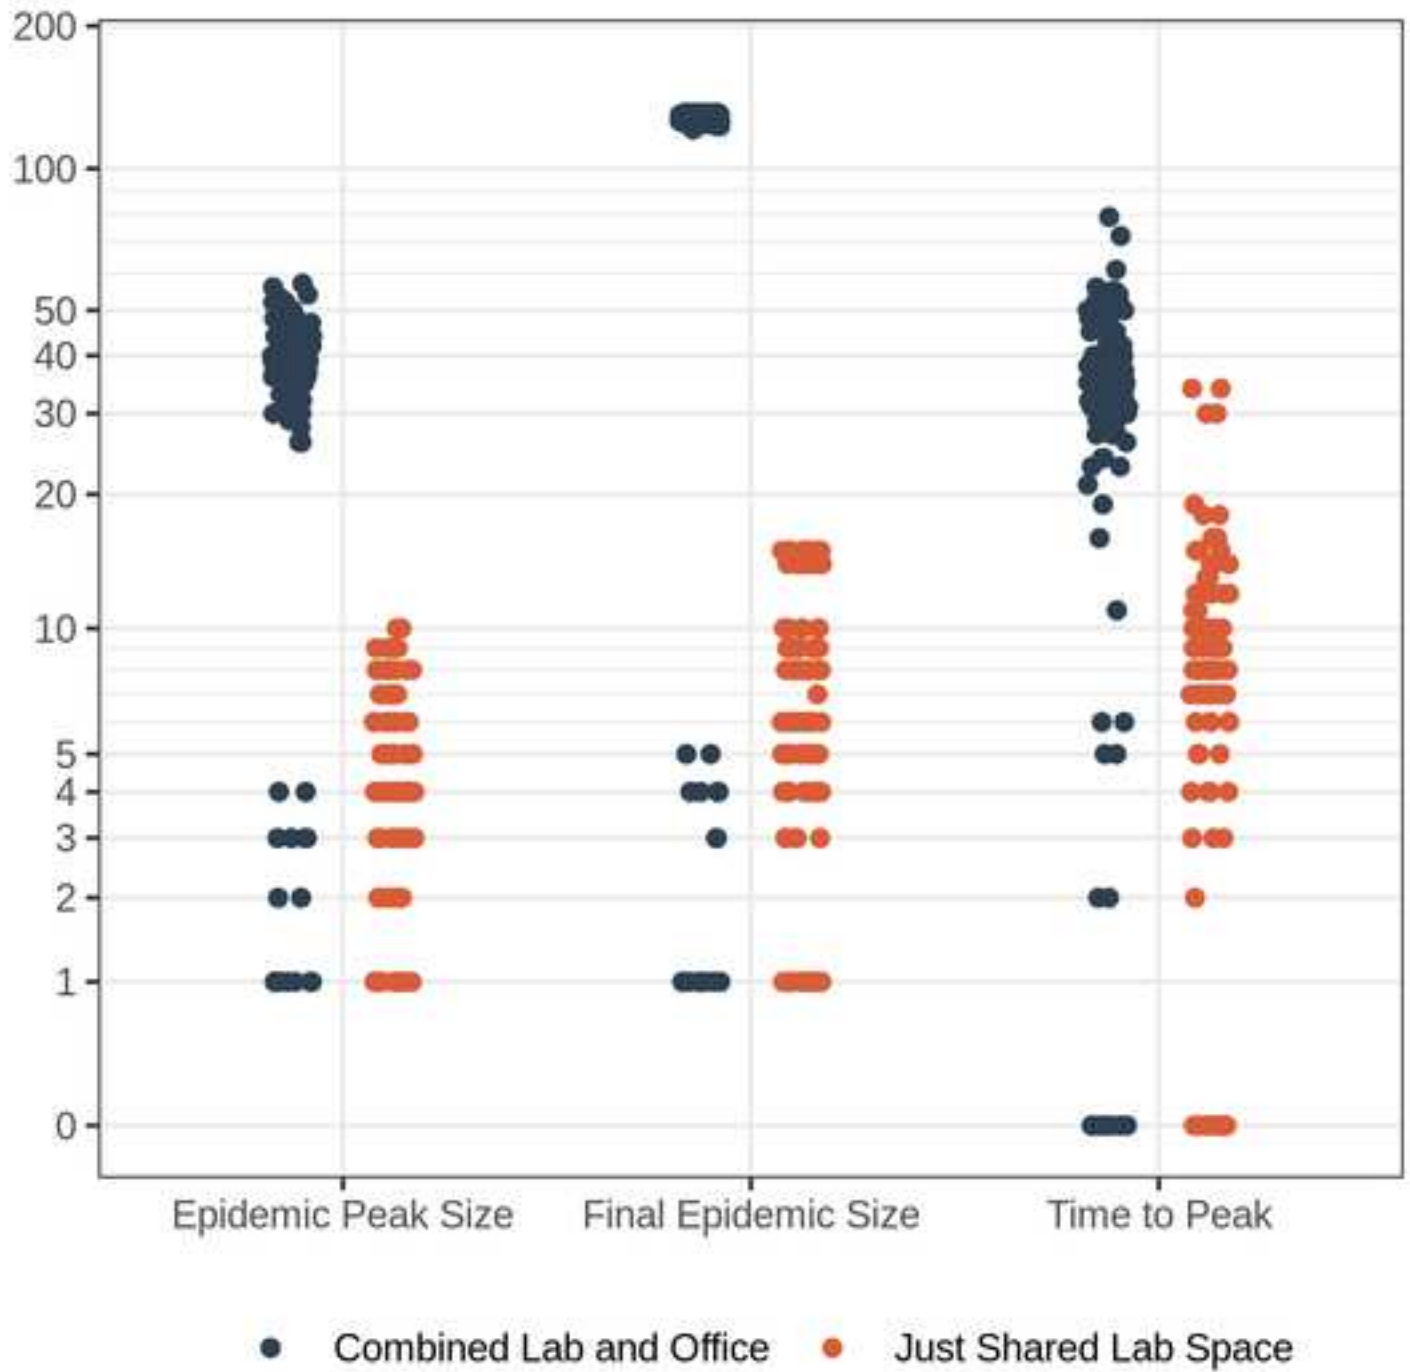

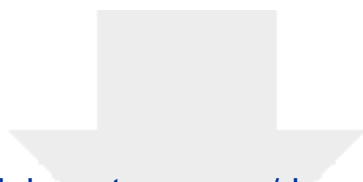

Click here to access/download  
**Supporting Information**  
figS1.tiff

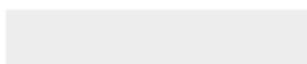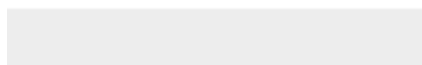



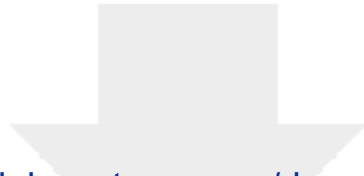

Click here to access/download  
**Supporting Information**  
figS2.tiff

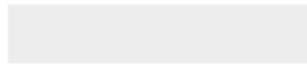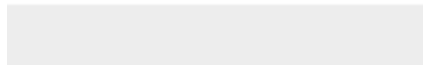

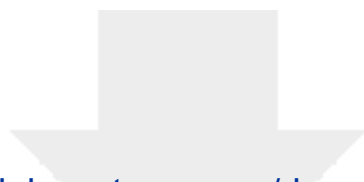

Click here to access/download  
**Supporting Information**  
figS3.tiff

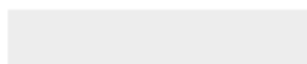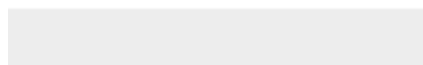



Click here to access/download  
**Supporting Information**  
figS4.tiff





Click here to access/download  
**Supporting Information**  
figS5.gif





Click here to access/download  
**Supporting Information**  
figS6.gif



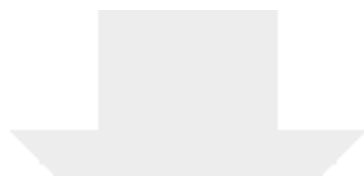

Click here to access/download  
**Supporting Information**  
figS7.tiff





Click here to access/download

**Supporting Information**

S8 supporting\_information\_simulations.pdf

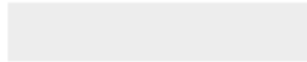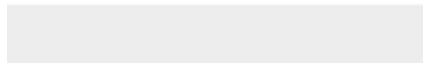

Source: https://medrxiv.org/content/medrxiv/early/2020/09/21/2020.05.27.20114728.full.pdf
